1 **Protective efficacy of an orf virus-vector encoding the hemmagglutinin and the nucleoprotein of**  
2 **influenza A virus in swine**

3

4 Lok R. Joshi<sup>1,2</sup>, David Knudsen<sup>2</sup>, Pablo Pineyro<sup>3</sup>, Santhosh Dhakal<sup>4</sup>, Gourapura J. Renukaradhya<sup>4</sup>, Diego G.  
5 Diel<sup>1,2#</sup>

6

7 <sup>1</sup>Department of Population Medicine and Diagnostic Sciences, Animal Health Diagnostic Center, College  
8 of Veterinary Medicine, Cornell University, Ithaca, New York, USA.

9

10 <sup>2</sup>Department of Veterinary and Biomedical Sciences, Animal Disease Research And Diagnostic  
11 Laboratory, South Dakota State University, Brookings, SD, United States.

12

13 <sup>3</sup>Department of Veterinary Diagnostic and Production Animal Medicine , Iowa State University, Ames,  
14 Iowa, USA.

15

16 <sup>4</sup>Department of Veterinary Preventive Medicine, Center for Food Animal Health, Ohio State University,  
17 Wooster, Ohio, USA.

18

19 #Corresponding author

20 E-mail: [dgdiel@cornell.edu](mailto:dgdiel@cornell.edu)

21

22

23

24

25

## 26 **Abstract**

27 Swine influenza is a highly contagious respiratory disease of pigs caused by influenza A viruses (IAV-S).  
28 IAV-S causes significant economic losses to the swine industry and poses constant challenges to public  
29 health due to its zoonotic potential. Thus effective IAV-S vaccines are highly desirable and would benefit  
30 both animal and human health. Here, we developed two recombinant orf viruses, expressing the  
31 hemagglutinin (HA) gene (OV-HA) or both the HA and the nucleoprotein (NP) genes of IAV-S (OV-HA-NP).  
32 The immunogenicity and protective efficacy of these two recombinant viruses were evaluated in pigs.  
33 Both OV-HA and OV-HA-NP recombinants elicited robust virus neutralizing antibody response in pigs.  
34 Notably, although both recombinant viruses elicited IAV-S-specific T-cell responses, the frequency of  
35 IAV-S specific proliferating T cells secreting IFN- $\gamma$  upon re-stimulation was higher in OV-HA-NP-  
36 immunized animals than in the OV-HA group. Importantly, IgG1/IgG2 isotype ELISAs revealed that  
37 immunization with OV-HA induced Th2-biased immune responses, whereas immunization with OV-HA-  
38 NP virus resulted in a Th1-biased immune response. While pigs immunized with either OV-HA or OV-HA-  
39 NP were protected when compared to non-immunized controls, immunization with OV-HA-NP resulted  
40 in better protective efficacy as evidenced by reduced virus shedding in nasal secretions and reduced  
41 viral load in the lung. This study demonstrates the potential of ORFV-based vector for control of swine  
42 influenza virus in swine.

43 **Key words:** Orf virus, swine influenza virus , vectored-vaccine, neutralizing antibodies, cell-mediated  
44 immunity

## 45 **Importance**

46 Effective influenza A virus (IAV-S) vaccines capable of providing robust protection to genetically diverse  
47 IAV-S in swine are lacking. Here, we explored the potential of orf virus based vectors expressing the  
48 hemagglutinating (HA) or both the HA and the nucleoprotein (NP) genes of influenza A virus (IAV-S) in  
49 eliciting protection against IAV-S in pigs. We observed that both recombinant viruses elicited IAV-S-  
50 specific humoral and cell-mediated immune responses in pigs. Addition of the NP and co-expression of  
51 this protein with HA, another major influenza protective antigen, resulted in higher T cell responses  
52 which presumably led to better protection in OV-HA-NP immunized animals, as evidenced by lower  
53 levels of virus shedding and viral load in lungs. This study highlights the the potential of ORFV as a vector  
54 platform for vaccine delivery against IAV-S. Results here provide the foundation for future development  
55 of broadly protective ORFV-based vectors for IAV-S for use in swine.

## 56 Introduction

57 Swine influenza is a highly contagious respiratory disease of pigs caused by influenza A viruses in  
58 swine (IAV-S). IAV-S is an enveloped, single stranded RNA virus of the family *Orthomyxoviridae*. The IAV-  
59 S genome consists of eight single-stranded negative-sense RNA segments encoding four structural (HA,  
60 NA, NP and M) and four non-structural (PB1, PB2, PA and NS) proteins. Influenza viruses are classified  
61 into subtypes based on the antigenicity of hemagglutinin (HA) and neuraminidase (NA) proteins present  
62 on the surface of the virus. There are three recognized subtypes of IAV-S that are currently circulating in  
63 the US: H1N1, H1N2 and H3N2 (1). The H1N1 subtype is the major subtype that has been prevalent in  
64 the US swine population for several decades; however, recent epidemiological data suggests an  
65 increasing incidence of H1N2 and H3N2 IAV-S subtypes (2, 3). IAV-S causes acute respiratory disease in  
66 pigs resulting in high morbidity (up to 100%). The mortality rate is usually low ( 1-4%) with most infected  
67 animals recovering within 3-7 days of infection (4, 5). The median yearly herd prevalence of IAV-S  
68 reported in the US is approximately 28%, but it can reach up to 57% in winter and spring months (6).  
69 IAV-S results in significant economic losses to the swine industry mainly due to weight loss, increased  
70 time to market, costs associated with treatment of secondary bacterial infections and mortality. This  
71 makes IAV-S one of the top three health challenges to the swine industry affecting pigs in all phases of  
72 production (7, 8). In addition to IAV-S, pigs are also susceptible to infection with avian and human IAVs  
73 thereby providing a niche for genetic reassortment between avian/human or swine influenza viruses.  
74 This poses a major threat for emergence of new subtypes as well as increases the risk of zoonotic  
75 transmission of IAVs. Therefore, effective prevention and control measures for IAV infections in swine  
76 have direct impacts on both animal and human health.

77 Currently, most available IAV-S vaccines are based on whole inactivated virus (WIV). However,  
78 these vaccines have not been able to effectively control IAV in swine and in some cases vaccine  
79 associated enhanced respiratory disease has been observed when there is an antigenic mismatch  
80 between vaccine strain and infecting strain (9). A live-attenuated influenza virus (LAIV) vaccine based on  
81 a virus containing a deletion of the NS1 gene, has been recently licensed for use in pigs in the US and  
82 may overcome some of the drawbacks of WIV vaccines (10). However, LAIV vaccines have the potential  
83 to reassort with the endemic viruses potentially resulting in new influenza virus variants. Indeed, novel  
84 variants that arose from reassortment between the vaccine virus and endemic field strains have been  
85 recently reported (11). These observations highlight the need for safer and more efficacious IAV-S

86 vaccine candidates. Here we investigated the potential of vectored vaccine candidates based on the  
87 parapox orf virus (ORFV) in controlling IAV-S infection in pigs.

88 Orf virus (ORFV) belongs to genus *Parapoxvirus* within the family *Poxviridae* (12) and is a  
89 ubiquitous virus that primarily causes a self-limiting mucocutaneous infection in sheep, goats and wild  
90 ruminants (13, 14). ORFV contains a double-stranded DNA genome with approximately 138 kbp in  
91 length and encodes 131 putative genes, including several with immunomodulatory (IMP) functions (15).  
92 Given ORFV IMP properties, the virus has long been used as a preventive and therapeutic agent in  
93 veterinary medicine (16, 17). Additionally, the potential of ORFV as a vaccine delivery platform against  
94 several viral diseases in permissive and non-permissive animal species has been explored by us and  
95 others (18–24). ORFV based vectored-vaccine candidates have been shown to induce protective  
96 immunity against pseudorabies virus (PRV), classical swine fever virus (CSFV) and porcine epidemic  
97 diarrhea virus (PEDV) (22, 25–27). Among the features that make ORFV a promising viral vector for  
98 vaccine delivery in swine are : (i) its restricted host range, (ii) its ability to induce both humoral and  
99 cellular immune response (22, 28), (iii) its tropism which is restricted to skin keratinocytes with no  
100 evidence of systemic dissemination, (iv) lack of vector-specific neutralizing antibodies which allows  
101 efficient prime-boost strategies using the same vector constructs (29, 30), and (v) its large genome size  
102 with the presence of several non-essential genes, which can be manipulated without severely impacting  
103 virus replication. Additionally, ORFV encodes several genes with well-characterized immunomodulatory  
104 properties. These include a homologue of interleukin 10 (IL-10) (31), a chemokine binding protein (CBP)  
105 (32), an inhibitor of granulocyte-monocyte colony stimulating factor GMC-CSF (33), an interferon  
106 resistance gene (VIR) (34), a homologue of vascular endothelial growth factor (VGEF) (35), and inhibitors  
107 of nuclear-factor kappa-B (NF- $\kappa$ B) signaling pathway (36–39). The presence of these well-characterized  
108 immunomodulatory proteins allowed us to rationally engineer ORFV-based vectors with enhanced  
109 safety and immunogenicity profile for use in livestock species, including swine (22–24).

110 Here we assessed the immunogenicity and protective efficacy of recombinant ORFV vectors  
111 expressing the HA protein alone or the HA and the nucleoprotein (NP) of IAV-S. While the HA protein  
112 contains immunodominant epitopes recognized by neutralizing antibodies (40, 41), the NP protein  
113 contains highly conserved immunodominant T-cell epitopes (42). We investigated whether co-  
114 expression of HA and NP would enhance the protective efficacy against IAV-S following intranasal  
115 challenge infection in pigs.

## 116 **Results**

117 **Construction of ORFV recombinants.** The OV-HA recombinant virus was obtained by inserting the full-  
118 length HA gene of IAV-S (H1N1) into ORFV121 locus by homologous recombination between a transfer  
119 plasmid pUC57-121LR-SIV-HA-loxp-GFP and the parental ORFV strain IA82 (Fig 1A). The OV-HA-NP  
120 recombinant virus was obtained by inserting the full-length HA gene into ORFV121 locus and the NP  
121 gene into ORFV127 locus. The wild type ORFV strain IA82 was used to generate the OV-HA virus which  
122 served as a parental virus for generation of the OV-HA-NP recombinant (Fig 1B). Expression of HA was  
123 driven by the vaccinia virus (VACV) 11L promoter (43) and expression of the NP gene was driven by the  
124 VACV vv7.5 promoter (44). After infection with the parental virus and transfection with the  
125 recombination plasmid, the recombinant viruses were obtained and selected. Several rounds of plaque  
126 assays were performed to obtain purified recombinant viruses. Once the recombinant viruses were  
127 purified and verified by PCR, the marker gene encoding for the green fluorescent protein (GFP) was  
128 removed by using the Cre recombinase system. Whole-genome sequencing of plaque purified  
129 recombinant viruses was performed after Cre recombinase treatment. Sequencing results confirmed the  
130 integrity and identity of ORFV sequences, demonstrated the presence of HA gene, deletion of ORFV121  
131 in OV-HA construct, the presence of HA and NP genes and deletion of ORFV121 and ORFV127 genes in  
132 OV-HA-NP construct.

133 **Replication kinetics of OV-HA and OV-HA-NP viruses *in vitro*.** Replication properties of both  
134 recombinant viruses (OV-HA and OV-HA-NP) were assessed *in vitro* in primary ovine fetal turbinate cells  
135 (OFTu) and primary swine turbinate cells (STU) using one-step and multi-step growth curves (Fig 1C).  
136 Cells were infected with an MOI of 0.1 or 10 and cell lysates were harvested at 6, 12, 24, 48, 72 hours  
137 post-infection. Both recombinants replicated efficiently in natural host OFTu cells. However, replication  
138 of OV-HA and OV-HA-NP viruses was markedly impaired in the STU cells (Fig 1C), which increases the  
139 safety profile of the vector for use in pigs.

140 **Expression of heterologous proteins by OV-HA and OV-HA-NP recombinant viruses.** Expression of the  
141 HA protein and NP proteins by OV-HA and/or OV-HA-NP viruses was confirmed by immunofluorescence  
142 assay (IFA) and flow-cytometry. As shown in the figure 2A, OV-HA recombinant expressed high levels of  
143 HA and OV-HA-NP recombinant expressed high levels of HA and NP proteins (Fig 2A). Expression of HA  
144 and NP were also confirmed by flow cytometry (Fig 2C). The IFA was also performed in non-  
145 permeabilized cells. Both HA and NP proteins were detected in non-permeabilized cells; however, the  
146 levels of protein detected were slightly lower than in permeabilized cells (Fig 2B). As expected this  
147 decrease was more evident for NP protein than for the HA protein. These findings suggest that while a

148 great proportion of the HA protein expressed by both OV-HA and OV-HA-NP recombinant viruses  
149 localizes to the cell surface, and expression of the NP protein is mostly confined to the intracellular  
150 compartment.

151 **Immunogenicity of OV-HA and OV-HA-NP in pigs.** To assess the immunogenicity of OV-HA and OV-HA-  
152 NP, 4-week old, IAV-S negative, weaned piglets were immunized intramuscularly with two doses of OV-  
153 HA and OV-HA-NP at a 21 day interval (Fig 3A; Table 1). Antibody response were evaluated using virus  
154 neutralization (VN) and hemagglutination inhibition (HI) assays. One week after the first immunization,  
155 neutralizing antibodies were detected in both vaccinated groups, however the levels were significantly  
156 higher in OV-HA-NP vaccinated animals (Fig 3B). An anamnestic increase in neutralizing antibody titers  
157 was seen in both vaccinated groups one week after the boost immunization (28 days post-  
158 immunization). After the booster immunization all animals maintained high level of neutralizing  
159 antibody levels until the end of the experiment (42 dpi, Fig. 3B).

160 Serological responses were also measured using an hemagglutination inhibition (HI) assay. The  
161 presence of HI antibodies were detected in OV-HA-NP group on day 7 pi. Similar to the VN results, an  
162 anamnestic increase in HI antibody titers was observed one week after the booster immunization in  
163 both groups (Fig 3C). Interestingly, the HI titers in the OV-HA group increased significantly after  
164 challenge, which is more evident a week after challenge (42 dpi). Such anamnestic increase in HI titers  
165 was not seen in OV-HA-NP-immunized animals, suggesting enhanced protection from IAV-S challenge in  
166 this group (Fig 3C). Overall, these results demonstrate that immunization with OV-HA and OV-HA-NP  
167 viruses elicited high IAV-S specific neutralizing and HI antibody responses in immunized pigs.

168 **IAV-S-specific IgG isotype responses elicited by immunization with OV-HA and OV-HA-NP viruses.** IAV-  
169 S specific IgG responses were measured using a whole virus ELISA. Low levels of IAV-S-specific total IgG  
170 antibodies were detected in OV-HA and OV-HA-NP immunized groups on 21 days pi (Fig 4A). Similar to  
171 VN and HI assay, significantly higher levels of IgG antibodies was observed a week following the boost  
172 immunization (day 28 pi). Thereafter consistently higher levels of IgG were detected in serum of both  
173 OV-HA and OV-HA-NP immunized groups until the end of the experiment (Fig 4A). As expected,  
174 expression and delivery of the NP by the OV-HA-NP recombinant virus elicited higher levels of IgG  
175 antibodies in immunized pigs after the booster immunization on day 21 pi when compared to those  
176 observed in OV-HA-immunized animals ( $P < 0.0001$ , Fig 4A).

177 The endpoint titer of IgG1 and IgG2 isotype antibodies elicited by immunization with OV-HA and  
178 OV-HA-NP were determined by an isotype ELISA performed on serum samples collected on 35 days pi.  
179 Immunization with OV-HA and OV-HA-NP viruses elicited similar levels of IgG1 response, however,  
180 significantly higher titers of IgG2 antibodies were detected in OV-HA-NP-immunized animals when  
181 compared to IgG2 titers detected in OV-HA-immunized animals (Fig 4B and 4C). The ratio of Th2-  
182 associated IgG1 isotype and Th1-associated IgG2 isotype (IgG1/IgG2 ratio) calculated based on the  
183 endpoint titers detected in each group was 1.31 (i.e. > 1) for the OV-HA group and 0.48 (i.e. < 1) for the  
184 OV-HA-NP group (Fig 4D). The IgG1/IgG2 ratio in OV-HA-NP group was significantly lower than in the OV-  
185 HA group ( $P = 0.0048$ , Mann-Whitney test). Together these results suggest that the immune response in  
186 OV-HA group is mostly Th2 biased. In contrast, the immune response was Th1 biased on the OV-HA-NP  
187 group as indicated by higher levels of IgG2 antibodies in the serum of OV-HA-NP immunized animals.

188 **Cellular immune responses elicited by immunization with OV-HA and OV-HA-NP.** IAV-S-specific T-cell  
189 responses elicited by immunization with OV-HA and OV-HA-NP viruses was assessed on peripheral blood  
190 mononuclear cells (PBMCs) collected on 35 days pi (pre-challenge infection). The frequency of different  
191 T-cell subsets secreting IFN- $\gamma$  following re-stimulation with IAV-S was measured using intracellular  
192 cytokine staining (ICS) assays. Upon singlet selection, live/dead cell discrimination, IFN- $\gamma$  expression by  
193 different T-cell subsets including total T-cells (CD3+), CD4+ T-cells (CD3+/CD4+), CD8+ T-cells (CD3+/CD4-  
194 CD8+), double positives (CD3+/CD4+/CD8+) and double negative T-cells (CD3+/CD4-/CD8-) were  
195 assessed. Animals immunized with either OV-HA or OV-HA-NP had significantly higher percentage of  
196 CD3<sup>+</sup> T-cells secreting IFN- $\gamma$  when compared to the non-immunized control animals (Fig 5A). Notably,  
197 within the vaccinated animals, OV-HA-NP group presented a significantly higher frequency of IFN- $\gamma$   
198 secreting CD3<sup>+</sup> T-cells than the OV-HA group ( $P=0.0055$ ). The animals in the OV-HA-NP group presented  
199 higher frequency of IFN- $\gamma$  secreting CD3+/CD4+ T-cells, however, the differences between the groups  
200 was not statistically significant. Both immunized groups presented increased frequencies of CD3+/CD8+,  
201 CD3+/CD4+/CD8+ (double positives) and CD3+/CD4-/CD8- (double negative) IFN- $\gamma$  secreting T-cell  
202 subsets when compared to the control sham-immunized group (Fig 5A).

203 IAV-S-specific T-cell responses were also evaluated by the carboxyfluorescein succinimidyl ester (CFSE)  
204 dilution assay to determine the specific T-cell subsets proliferating upon re-stimulation of PBMCs with  
205 inactivated IAV-S. As described above for the IFN- $\gamma$  ICS, upon singlet selection and dead cell exclusion,  
206 proliferation by the major swine T-cell subsets was evaluated (Fig 5B). While proliferation of CD3+ T-cell  
207 subset was observed in animals immunized with OV-HA or OV-HA-NP, significant proliferation of CD3+ T-



208 cells was observed in OV-HA-NP group upon recall stimulation ( $P=0.0095$ ; Fig 5B). Additionally, a  
209 significant increase in the proliferation of CD3+/CD8+ T-cell subset was observed in the OV-HA-NP group  
210 ( $P=0.0217$ , Fig 5B). An increase in proliferation of CD3+/CD4+ T-cells was also observed (Fig 5B);  
211 however, the differences between the treatment groups were not statistically significant (Fig 5B).  
212 Overall, these results show that both OV-HA and OV-HA-NP group were able to induce IAV-S-specific T-  
213 cell responses in the immunized animals. As expected, T-cell responses elicited by immunization with  
214 the OV-HA-NP construct was higher than those observed in animals immunized with the single gene OV-  
215 HA construct.

216 **Protective efficacy of OV-HA and OV-HA-NP viruses intranasal IAV-S challenge.** The protective efficacy  
217 of OV-HA and OV-HA-NP were evaluated upon intranasal challenge with IAV-S (after day 35 pi). Virus  
218 shedding was assessed in nasal secretions and viral load and pathology were evaluated in the lung. Nasal  
219 swabs were collected on days 0, 1, 3, and 7 post-challenge (pc) and IAV-S RNA levels were investigated  
220 in nasal secretions using real-time reverse transcriptase PCR (rRT-PCR). On day 1 pc, significantly lower  
221 IAV-S genome copy numbers – indicating reduced virus shedding – was detected in both OV-HA and OV-  
222 HA-NP immunized groups when compared to the control sham immunized group (Fig 6A). Only two  
223 animals (2/8) in the OV-HA-NP group were positive for viral RNA on day 1 pc. On 3 dpc, while all animals  
224 in control group (8/8) were positive and presented high genome copy numbers of IAV-S in nasal  
225 secretions, only three animals (3/8) in OV-HA-NP were positive for viral RNA (Fig 6A). Notably, the  
226 amount of IAV-S RNA shed by OV-HA-NP-immunized animals were significantly lower than the amount  
227 shed by control or OV-HA immunized animals. It is also important to note that animals in OV-HA group  
228 had significantly lower level of viral RNA than control group on day 3 pi (Fig. 6A). On day 7 post-  
229 challenge, all animals (8/8) in the control sham-immunized group were still shedding IAV-S in nasal  
230 secretions, while only two animals (2/8) in the OV-HA-immunized group were positive presenting low  
231 viral RNA copy numbers in nasal secretions. Notably, none of the animals in the OV-HA-NP-immunized  
232 group were shedding IAV-S in nasal secretions on day 7 pi (Fig 6A). These results demonstrate that  
233 immunization with OV-HA and OV-HA-NP resulted in decreased virus shedding and shorter duration of  
234 virus shedding in nasal secretions following intranasal IAV-S challenge. Notably, these differences were  
235 more pronounced in OV-HA-NP-immunized animals.

236 Shedding of infectious IAV-S was also assessed in nasal secretions collected on days 0, 1, 3, and  
237 7 post-challenge. Each sample was subjected to three blind passages in MDCK cells. An  
238 immunofluorescence assay using an IAV-S NP-specific monoclonal antibody was performed on the third



239 passage to confirm isolation of IAV-S. On day 1 pc, 4 (50%) animals in the control group were positive for  
240 IAV-S, while none of the animals from the OV-HA and OV-HA-NP group were positive on VI (Table 2) . On  
241 day 3 pc, 7 (87.5%) animals were positive in the sham-immunized control group; 3 (37.5%) animals were  
242 positive in OV-HA immunized group and 1 (12.5%) animal was positive in OV-HA-NP-immunized group.  
243 Statistical analysis confirmed that there was a significant difference in the number of IAV-S positive  
244 animals between control group and OV-HA-NP group on 3 dpc (  $P= 0.0101$  Fisher's exact test) (Table 2).  
245 IAV-S was not isolated from any of the animals on day 7 post-challenge (Table 2) . These results indicate  
246 that both OV-HA and OV-HA-NP recombinants were able to reduce virus replication and shedding in the  
247 immunized animals. Importantly, detection of infectious virus in only one out of eight animals in OV-HA-  
248 NP groups highlights the robust protection provided by immunization of pigs this recombinant virus.

249         Viral load was assessed in the lung of control and immunized pigs on day 7 dpc by using rRT-PCR.  
250 While high amounts of IAV-S RNA were detected in the lung of animals in the control sham-immunized  
251 group, immunization with OV-HA or OV-HA-NP led to a marked decrease in viral load in the lung (Fig 6B).  
252 Notably, only one animal (1/8) in the OV-HA-NP group and two animals (2/8) in OV-HA group presented  
253 IAV-S RNA in lung, whereas all the animals in control group (8/8) were positive for IAV-S RNA.  
254 Significantly lower IAV-S RNA loads were detected in the lung of immunized animals when compared to  
255 control animals (Fig 6B)

256         In addition to viral loads pathological changes were also evaluated in the lung of all animals in  
257 the study. At necropsy, macroscopic lesions in the lung were characterized by a pathologist who was  
258 blinded to the experimental groups. A summary of the gross lung lesions is provided on Table 3. All  
259 animals in the control group presented characteristic plum-colored consolidated areas mostly on the  
260 cranioventral areas and interstitial pneumonia. Mild lobular consolidation and interstitial pneumonia  
261 was present in 2 animals in OV-HA group and 2 animals in OV-HA-NP group. As expected, the lesions  
262 were primarily observed in animals having relatively lower levels of neutralizing antibody titers (Table 3).  
263 No microscopic lesions were observed in any animals on day 7 post-challenge. Together these results  
264 indicate that immunization with ORFV-based vectors, especially with OV-HA-NP virus provided good  
265 protection against intranasal homologous IAV-S challenge in pigs.

## 266 **Discussion**

267         In this study we explored the potential of ORFV recombinants expressing the HA or both HA and  
268 NP proteins of IAV-S in providing protection against intranasal challenge infection in swine. Previous

269 work from our group have shown that rational vector design by deleting well-characterized  
270 immunomodulatory genes of ORFV is useful in developing highly effective vaccine delivery platforms  
271 resulting in safe and highly immunogenic vaccine candidates. One of the well characterized ORFV IMPs is  
272 ORFV121 , which encodes an NF- $\kappa$ B inhibitor that determines ORFV virulence and pathogenesis in the  
273 natural host (39). We have developed highly immunogenic vaccine candidates for porcine epidemic  
274 diarrhea virus (PEDV) and rabies virus (RabV) by inserting appropriate protective antigens (spike  
275 glycoprotein for PEDV; rabies glycoprotein for RabV) in the *ORFV121* gene locus. Given the  
276 immunogenicity and safety profile of the OV-PEDV-S and OV-RABV-G recombinant virus in swine, here  
277 we constructed an OV-HA recombinant by inserting the HA gene of IAV-S virus in ORFV121 locus.  
278 Moreover, to potentially enhance T-cell immune response elicited by the vaccine we generated a second  
279 recombinant virus expressing both IAV-S NP and HA proteins. For this, another well-characterized ORFV  
280 IMP, the ORFV127 was selected as an insertion site for the NP gene. ORFV127 encodes a viral IL-10  
281 homolog (15, 45), which is known to have anti-inflammatory and immunosuppressive activities that may  
282 favor immune evasion of the orf virus (46, 47). Most importantly, the protein encoded by ORFV127 is  
283 known to contribute to ORFV virulence in the natural host (48). Using this approach we tested the  
284 hypothesis that simultaneous deletion of two ORFV IMP genes ORFV121 and ORFV127 and concurrent  
285 insertion of two highly immunogenic protective antigens of IAV-S (HA and NP) would enhance the  
286 immunogenicity of the recombinant virus in swine and provide higher protective efficacy from IAV-S  
287 challenge. While the data presented here show that both recombinants OV-HA and OV-HA-NP induced  
288 robust immune response against IAV-S in pigs, the immunogenicity and protective efficacy of OV-HA-NP  
289 was indeed higher than that elicited by the OV-HA recombinant which substantiates our hypothesis. The  
290 increased protective efficacy seem to be related to stronger T-cell response elicited by immunization  
291 with the OV-HA-NP virus.

292         Following challenge infection, we observed interesting differences in the antibody response  
293 elicited by OV-HA and OV-HA-NP immunization. As expected, intranasal challenge with IAV-S in sham  
294 immunized pigs resulted in anamnestic VN response. Notably, in the immunized groups the VN antibody  
295 titers increased by a greater magnitude in the OV-HA group than in the OV-HA-NP group. In the OV-HA  
296 group, the geometric mean VN titers were 380.5 and 3319.9 on days 0 and 7 pc respectively, indicating a  
297 9-fold increase in the VN titer after challenge. Whereas in OV-HA-NP group, the geometric mean VN  
298 titers were 1395.8 and 1810.19 on days 0 and 7 pc respectively, which is only a modest 1.2-fold increase  
299 in VN titers pc. Importantly, the VN titers in OV-HA-NP immunized group increased only in the two  
300 animals that had the lowest VN titer on day 0 pc. The VN titers in the remaining 6 animals in the OV-HA-

301 NP group remained constant following challenge infection. These results demonstrate that  
302 immunization with the OV-HA-NP recombinant virus provided robust immune protection against  
303 intranasal IAV-S challenge, with most animals not seroconverting to the challenge virus.

304 The importance of T-cells in influenza virus clearance and their cross-reactive potential has been  
305 well documented (49, 50). In this context, CD4+ T-cells help with activation, differentiation and antibody  
306 production by virus-specific B cells (51). Additionally, CD4+ helper cells also play an important role in  
307 CD8+ cytotoxic T cell activation. Activated CD8+ cytotoxic T-cells function in virus clearance by killing  
308 infected cells (52). The NP protein of influenza virus is known to contain several immunologically  
309 dominant T-cell epitopes and it is the main antigen recognized by cytotoxic T- lymphocytes (CTL) during  
310 influenza A virus infections (42, 53–56). The Immune Epitope Database and Analysis Resource, a  
311 manually curated database of experimentally characterized immune epitopes, has recorded 248 T-cells  
312 epitopes for nucleoprotein (NP) of influenza virus. Given that NP is relatively conserved among influenza  
313 viruses, including in IAV-S, this protein has been one of the target viral antigens for the development of  
314 universal influenza vaccine candidates. Because of these important immunological properties, we have  
315 developed and evaluated the OV-HA-NP construct expressing both HA and NP proteins. We found that  
316 cell mediated immune responses were enhanced by co-delivery and expression of IAV-S HA and NP by  
317 OV-HA-NP in pigs when compared to OV-HA group. A significantly higher frequency of CD3+ T-cells  
318 proliferated and expressed IFN- $\gamma$  upon re-stimulation with IAV-S in the OV-HA-NP-immunized group.  
319 Importantly, immunization with OV-HA-NP resulted in a increased frequency of CD3+/CD8+ T cells upon  
320 restimulation with IAV-S. While overall T-cell responses were higher in OV-HA-NP group, an increase in  
321 T-cell response was also seen in OV-HA group when compared to the sham immunized group, as  
322 evidenced by increase in IFN- $\gamma$  secreting CD3+ T-cell population following antigen stimulation. This can  
323 be explained by the presence of several T-cells epitopes in the IAV HA protein, the majority of which  
324 have been identified as CD4+ T-cell epitopes (57, 58).

325 Depending upon the type of antigenic stimulation, CD4+ helper T-cell precursors (Th<sub>0</sub>) can either  
326 differentiate into Th1- or Th2- helper cells. Th1 cells secrete several cytokines including IFN- $\gamma$  and IL-12  
327 which help in cell mediated immunity, whereas Th2 cells secrete cytokines like IL-4, IL-6 which  
328 contribute to antibody mediated immunity (40, 59). Importantly, IgG isotype expression is also  
329 controlled by the different cytokines (60, 61). In pigs, IFN- $\gamma$  enhances production of IgG2 isotype and  
330 hence this IgG isotype is considered to be associated with Th1 immune response. On the other hand,  
331 cytokines like IL-4, IL-10 induce secretion of IgG1 and are known to be associated with Th2 immune

332 response (62). Thus, the ratio of IgG1:IgG2 can be used to infer Th1/Th2 bias in response to vaccination.  
333 In this study, we found a higher level of IgG1 in pigs immunized with OV-HA recombinant (IgG1:IgG2 >1,  
334 Th2 bias), which suggests that the protection may have been mostly antibody-mediated in this group.  
335 Conversely, in OV-HA-NP group, the levels of IgG2 were higher (IgG1:IgG2 <1, Th1 bias), which suggests a  
336 bias towards cell-mediated immunity in this group. Given that NP protein is known to induce cell-  
337 mediated immunity, it would be safe to assume that this Th1 bias might be due to NP protein present in  
338 the OV-HA-NP recombinant.

339 This study further demonstrates the use of ORFV as a vaccine delivery platform in swine. The  
340 study also shows that two ORFV IMP encoding genes (ORFV121 and ORFV127) can be deleted  
341 simultaneously from the virus genome to efficiently delivery at least two viral antigens in swine. One of  
342 the advantages of ORFV-based vectors is that same vector can be used repeatedly for prime-boost  
343 regimens. This is important because pre-existing immunity precludes the use of many vector platforms  
344 for vaccine delivery. The humoral immune response data presented here shows that a boost effect was  
345 induced after second immunization. In fact, previous findings from our lab show that similar effect can  
346 be observed even after three immunizations with ORFV. The recombinant HA and NP protein used in  
347 this study share 95% amino acid identity with the HA and NP protein of the challenge virus. In future, we  
348 plan to use the HA gene from other IAV-S subtypes to develop multivalent vaccine candidates and  
349 evaluate heterosubtypic protection. The analysis of secretory IgA immune response, which play an  
350 important role in providing mucosal immune response is lacking in this study. Future studies involving  
351 detailed analysis of mucosal immune response elicited by ORFV-based constructs and challenge  
352 infection with heterologous IAV strains are warranted. Nonetheless, results presented here demonstrate  
353 that ORFV-based vectors can be important tools to develop improved vaccine candidates to effectively  
354 control IAV-S infections in swine.

## 355 **Material and methods**

356 **Cells and viruses.** Primary ovine turbinate cells (OFTu), Madin-Darby canine kidney cells (MDCK) and  
357 swine turbinate cells (STU) were cultured at 37 °C with 5% CO<sub>2</sub> in minimum essential medium (MEM)  
358 supplemented with 10% FBS, 2 mM L-glutamine and containing streptomycin (100 µg/mL), penicillin  
359 (100 U/mL and gentamycin (50 µg/ mL).

360 The ORFV strain IA82 (OV-IA82; kindly provided by Dr. Daniel Rock at University of Illinois Urbana-  
361 Champaign), was used as the parental virus to construct the recombinants and in all the experiments

362 involving the use of wild-type ORFV. Wild-type and recombinant ORFV viruses were amplified in OFTu  
363 cells. Swine influenza virus H1N1 A/Swine/OH/24366/2007 (H1N1), kindly provided by Gourapura Lab  
364 was used for virus challenge, virus neutralization assay, hemagglutination inhibition (HI), and as a  
365 coating antigen for whole virus ELISA. The H1N1 A/Swine/OH/24366/2007 (H1N1) virus was propagated  
366 in MDCK cells using DMEM containing TPCK-treated trypsin ( 2 µg/mL) and 25 mM HEPES buffer.

367 **Generations of recombination plasmids.** To insert the heterologous IAV-S gene in the ORFV121 locus, a  
368 recombination plasmid containing right and left flanking sequences of the ORFV121 gene were inserted  
369 into pUC57 plasmid. The HA gene of swine influenza virus, A/SW/OH/511445/2007 (OH7) (GenBank :  
370 EU604689) (63) was inserted between the ORFV121 flanking sequence in the pUC57 plasmid. The HA  
371 gene was codon optimized for swine species (GenScript). The HA gene was cloned under the vaccinia  
372 virus (VACV) I1L promoter (5'-TATTTAAAAGTTGTTTGGTGAAGTTAAATGG – 3' ) (43) and a flag-tag epitope  
373 (DYKDDDK) was fused to the amino terminus of the HA gene to detect its expression. The gene encoding  
374 green fluorescent protein (GFP) was inserted downstream of HA gene and used as a selection marker for  
375 recombinant virus purification. The GFP sequence was flanked by *loxP* sequences 5'-  
376 ATAACCTTCGTATAATGTATACTATACGAAGTTAT-3' to allow for removal of GFP by Cre recombinase  
377 following recombinant virus purification. This recombination cassette was named pUC57-121LR-SIV-HA-  
378 loxp-GFP (Fig 1A).

379 Similarly, another recombination cassette was generated to insert NP gene of IAV-S into the ORFV  
380 ORFV127 locus. A recombination cassette for ORFV127 was constructed as describe above with the  
381 ORFV127 left and right flanking regions being cloned into the pUC57-LoxP-GFP plasmid (pUC57-127LR-  
382 LoxP-GFP. The nucleoprotein (NP) gene of swine influenza virus, A/SW/OH/511445/2007 (OH7)  
383 (GenBank: EU604694) (63) was inserted between ORFV127 left and right flanks. The NP gene was cloned  
384 under the VACV vv7.5 promoter (44) and the HA epitope tag sequence (YPYDVPDYA) was fused at the  
385 amino terminus of the NP protein to detect its expression by the recombinant virus. In addition, an  
386 eukaryotic Kozak consensus sequence 5'-gcccaaccATGg-3' (64) ,where ATG refers to the start codon of  
387 the NP gene, was added immediately downstream of vv7.5 promoter. This recombination cassette was  
388 named pUC57-127LR-SIV-NP-loxp-GFP (Fig 1B).

389 **Generation of recombinant OV-HA and OV-HA-NP viruses.** The HA gene of IAV-S was inserted into the  
390 ORFV121 locus of the ORFV genome by homologous recombination. Briefly, OFTu cells cultured in 6-well  
391 plate were infected with OV-IA82 with a multiplicity of infection (MOI) of 1. Three hours later, the  
392 infected cells were transfected with 2 µg of pUC57-121LR-SIV-HA-loxp-GFP using Lipofectamine 3000

393 according to the manufacturer's instruction (Invitrogen, catalog no: L3000-075). At 48 hours post-  
394 infection/transfection cell cultured were harvested, subjected to three freeze-and-thaw cycles. The  
395 ORFV recombinant expressing IAV-S HA was purified using plaque assay by selecting viral foci expressing  
396 GFP. After several rounds of plaque purification, the presence of HA gene and absence of ORFV121 gene  
397 was confirmed by PCR as described before (22, 24) and the insertion and integrity of the whole genome  
398 sequence of the recombinant was confirmed sequencing using Nextera XT DNA library preparation  
399 following by sequencing on the Illumina Mi-Seq sequencing platform. Once the purified recombinant  
400 virus was obtained, the GFP selection gene was removed by using Cre recombinase treatment as  
401 described below. This recombinant is referred to as OV-HA throughout this manuscript.

402 Similarly, double gene expression vector containing the IAV-S HA and NP genes in ORFV121 and  
403 the ORFV127 gene loci (48), respectively was generated by homologous recombination. Both ORFV121  
404 and ORFV127 are virulence determinants that contribute to ORFV IA-82 virulence in the natural host  
405 (39, 48). For this, infection/transfection was performed by infecting OFTu cells with the OV-HA  
406 recombinant virus and transfecting with pUC57-127LR-SIV-NP-loxp-GFP plasmid. The recombinant virus  
407 was purified using plaque assay as described above and following purification the GFP reporter gene was  
408 removed using the Cre recombinase treatment described below. The resulting recombinant ORFV vector  
409 expressing the HA and NP gene is referred to as OV-HA-NP in this manuscript.

410 The Cre/loxP recombination system was used to remove the GFP reporter gene from the OV-HA  
411 or OV-HA-NP recombinants. A plasmid pBS185 CMV-Cre, carrying the cre gene under the hCMV  
412 promoter was a kind gift from Brian Sauer (65) (Addgene catalog number : 11916). OFTu cells were  
413 plated in a 24-well plate and 24h later transfected with 500 ng of the pBS185-CMV-Cre plasmid using  
414 Lipofectamine 3000 (Invitrogen, catalog num: L3000-075) according to the manufacturer's instructions.  
415 Approximately 24h after transfections, cells were infected with ~ 1 MOI of the plaque purified  
416 recombinant viruses (OV-HA-GFP or OV-HA-NP-GFP). Approximately 48 h post-infection, the cre  
417 recombinase treated recombinant viruses were harvested and subjected to a second round of Cre  
418 treatment as described above. Following cre recombinase treatment, two to three rounds of plaque  
419 assays were performed to select foci lacking GFP expression and to obtain reporterless OV-HA or OV-HA-  
420 NP recombinant viruses. Following markerless virus selection complete genome sequencing was  
421 performed to determine the integrity of ORFV and IAV-S sequences in the recombinant OV-HA and OV-  
422 HA-NP viruses.



423 **Growth curves.** Replication kinetics of OV-HA and OV-HA-NP recombinant viruses were assessed *in vitro*  
424 in OFTu and STU cells. Briefly, OFTu and STU cells cultured in 12-well plates were inoculated with OV-HA  
425 or OV-HA-NP with a multiplicity of infection (MOI) of 0.1 (multistep growth curve) or 10 (single-step  
426 growth curve) and harvested at 6, 12, 24, 48, 72 hours post-infection (hpi). Virus titers in cell lysates and  
427 supernatants were determined on each time point using Sperman and Karber's method and expressed  
428 as tissue culture infectious dose 50 (TCID<sub>50</sub>) per milliliter (66).

429 **Immunofluorescence.** Immunofluorescence assay (IFA) was used to assess expression of the  
430 heterologous proteins by the OV-HA or the OV-HA-NP viruses as described previously (67). Briefly, OFTu  
431 cells were inoculated with each recombinant virus (MOI of 1) and fixed with 3.7% formaldehyde at 48  
432 hours pi. Then, cells were permeabilized with 0.2% PBS-Triton X-100 for 10 min at room temperature.  
433 Another set of samples which were not permeabilized were also tested side-by-side to compare the  
434 expression pattern between permeabilized and non-permeabilized cells. Flag-tag specific mouse antibody  
435 (Genscript, catalog no: A100187) and HA-tag specific rabbit antibody (Cell Signaling, catalog no: 3724S)  
436 were used as primary antibody to detect HA and NP protein respectively. Then, cells were incubated  
437 with Alexa fluor 594 goat anti-mouse IgG (H+L) secondary antibody (Invitrogen, catalog no: A11005) or  
438 Alexa fluor 488 goat anti-rabbit IgG antibody and cells were observed under fluorescence microscope.

439 **Animal immunization and challenge studies.** The immunogenicity of the two recombinant viruses (OV-  
440 HA and OV-HA-NP) was evaluated in 3-week old high-health pigs. A summary of experimental design is  
441 presented in Table 1. Twenty-four pigs, seronegative for IAV-S, were randomly allocated into three  
442 experimental groups as follows: Group 1, sham immunized (n=8); Group 2, OV-HA immunized (n=8);  
443 Group 3, OV-HA-NP immunized (n=8). Immunization was performed by intramuscular injection of 2 ml of  
444 a virus suspension containing 10<sup>7</sup> TCID<sub>50</sub>/mL in MEM. All animals were immunized on day 0 and received  
445 a booster immunization on day 21 post-immunization. All animals were challenged intranasally on day  
446 35 post-immunization with 5 mL virus inoculum containing 6 X 10<sup>6</sup> TCID<sub>50</sub> of H1N1  
447 A/Swine/OH/24366/2007 (H1N1) (68) per animal. Animals were monitored daily for clinical signs of IAV-  
448 S. Serum and PBMC samples were collected on days 0, 7, 14, 21, 28, 35, 38 and 42 days post-  
449 immunization. Nasal swabs were collected on days 0, 1, 3, 7 post-challenge. The experiment was  
450 terminated on day 42 post-immunization or 7 days post-challenge. Whole lung as a unit were collected  
451 from euthanized animals during necropsy and examined grossly for pathologic changes by a pathologist  
452 blinded to study groups. Animal immunization challenge studies were conducted at South Dakota State



453 University (SDSU) Animal Resource Wing (ARW), following the guidelines and protocols approved by the  
454 SDSU Institutional Animal Care and Use Committee (IACUC approval no. 17-018A)

455 **Virus neutralization (VN) assay.** Virus neutralization titer in the serum samples were determined as  
456 described previously (69). Briefly, serum samples were heat inactivated for 30 minutes at 56 °C. Two-  
457 fold serial dilutions of serum were incubated with 200 TCID<sub>50</sub> of IAV-S, A/Swine/OH/24366/2007 (H1N1),  
458 at 37 °C for 1 hour. This virus-serum complex was then transferred to a 96-well plate pre-seeded with  
459 MDCK cells 24 h earlier. After 1 hour of adsorption, virus-serum complex was removed and fresh DMEM  
460 containing 2 µg/mL of TPCK-treated trypsin was added to the cells. After 48-hour incubation at 37 °C,  
461 cells were fixed with 80% acetone. Virus positive MDCK cells were detected by immunofluorescence  
462 assay using a mouse monoclonal antibody targeting nucleoprotein (NP) of influenza virus (IAV-NP HB-65  
463 mAb; kindly provided by Drs. Eric Nelson and Steve Lawson at SDSU). The virus neutralization titer was  
464 defined as the reciprocal of the highest dilution of serum where there was complete inhibition of  
465 infection/replication as evidenced by absence of fluorescent foci. Appropriate positive and negative  
466 control samples were included in all the plates.

467 **Hemagglutination inhibition (HI) assay.** HI assay was performed according to the method described  
468 previously (69). Briefly, serial 2-fold dilution (starting dilution 1:4) were prepared in PBS. Then 4 HA units  
469 of H1N1 A/Swine/OH/24366/2007 virus was added to the serum dilutions and incubated at room  
470 temperature for 1 hour. A solution (in PBS) of turkey red blood cells (containing 0.5% RBC) were added  
471 to the wells and allowed to settle. The HI titer was calculated as the reciprocal of the highest dilution of  
472 sera that inhibited hemagglutination of turkey RBC.

473 **Real-time reverse transcriptase PCR (rRT-PCR).** Virus shedding in nasal secretions and viral load in  
474 lungs was evaluated by rRT-PCR. Lung tissues were homogenized using tissue homogenizer by adding 10  
475 mL of DMEM in 1 g of lung tissue. Viral nucleic acid was extracted from the nasal swabs and lung tissue  
476 homogenates using the MagMax Viral RNA/DNA isolation Kit (Life Technologies). The rRT-PCR tests were  
477 performed at Animal Disease Research and Diagnostic Lab (ADRDL), SDSU, SD. Genome copy numbers  
478 per milliliter were determined based on the relative standard curve derived from four-parameter logistic  
479 regression analysis ( $R\text{-square}=0.9928$ ,  $Root\ mean\ square\ error\ (RMSE)=1.0012$ ).

480 **Virus isolation.** Virus isolation was performed on the nasal swabs collected on day 0, 1, 3, and 7 post-  
481 challenge. Nasal swabs were filtered through a 0.22-micron filter and mixed with DMEM containing 2  
482 µg/mL of TPCK-treated trypsin in 1:1 ratio. Then, 250 µL of this inoculum was added to 24-well plate

483 containing MDCK cells. The cells were incubated for 1 hour at 37 °C. After 1 hour adsorption, 250 µL of  
484 DMEM was added to the wells and plate was incubated for 48 hours. After 48 hours, cell lysate was  
485 harvested, and two more blind serial passages were performed. After the third passage, the supernatant  
486 was collected, and the cells were fixed with 80% acetone. Immunofluorescence assay (IFA) was  
487 performed using IAV-NP mAb (IAV-NP HB-65) as primary antibody and Alexa fluor 594 goat anti-mouse  
488 antibody as secondary antibody (Invitrogen, catalog no: A11005). SIV infected cells were identified  
489 based on the presence of fluorescent foci.

490 **ELISA.** IAV-S-specific IgG, IgG1a and IgG2a immune response elicited by immunization with OV-HA or  
491 OV-HA-NP were assessed by whole virus ELISA. The antigen for coating the ELISA plates was prepared as  
492 described previously (70) with some modifications. Briefly, ultra-centrifugation of virus culture  
493 supernatant and the virus pellet in 30% sucrose cushion gradient were performed using Optima-L 100K  
494 ultracentrifuge (Beckman Coulter) at 18,000 RPM for 1.5 hours. The virus pellet was resuspended in  
495 DMEM and UV inactivation of the virus was carried out using CL1000 UV crosslinker. Determination of  
496 the optimal coating antigen concentration and dilution of secondary antibodies were carried out by  
497 checkerboard titration.

498 To detect IAV-S specific total IgG, Immulon 1B ELISA plates (ThermoFisher Scientific, catalog no:  
499 3355) were coated with 250 ng/well of concentrated and UV inactivated IAV-S virus and incubated at 37  
500 °C for 2 hours. Then plates were washed three times with PBST (1X PBS with 0.5% Tween-20) and  
501 blocked with 200 µL/well of blocking solution (5% milk in PBST) and incubated overnight at 4 °C. Then,  
502 the plates were washed three times with PBST. Serum samples diluted in blocking solution at the  
503 dilution of 1:100 was added, and the plates were incubated for 1 hr at room temperature (RT). After,  
504 three washes with PBST, 100 µL of biotinylated anti-pig IgG antibody (Bethyl, catalog no: A100-104)  
505 diluted in blocking buffer (1:4000) was added to the plate and incubated for 1 hr at RT. Following three  
506 washes, HRP-conjugated streptavidin (Thermo Scientific, catalog no: 21136) diluted in blocking solution  
507 (1:4000) was added to plates and incubated for 1 hr at RT. Plates were washed again for three times  
508 with PBST and 100 µL/well of 3,3',5,5'-tetramethylbenzidine (TMB) substrate was added to the plates  
509 (KPL, catalog no: 5120-0047). Finally, the colorimetric reaction was stopped by adding 100 µL 1N HCl  
510 solution per well. Optical density (OD) values were measured at 450 nm using a microplate reader. Cut-  
511 off value was determined as mean OD of negative serum samples plus three times of standard deviation  
512 (mean + 3SD).

513 Isotype ELISA were performed on the serum samples collected on day 35 post-immunization.  
514 For isotype ELISA, mouse anti-pig IgG1 (Biorad, catalog no: MCA635GA) and mouse anti-pig IgG2  
515 antibody (Biorad, catalog no: MCA636GA) were used as secondary antibodies and plates were incubated  
516 with biotinylated anti-mouse antibody (KPL, catalog no: 5260-0048) before incubating with streptavidin-  
517 HRP antibody. Endpoint titer ELISA using serial two-fold serial dilutions of serum samples were  
518 performed to determine endpoint titer of SIV-specific IgG1 and IgG2 antibody levels in the serum  
519 samples. Other procedures were similar to the total IgG ELISA as described above.

520 **Flow-cytometry.** IAV-S-specific T-cell response elicited by ORFV recombinants was evaluated by an  
521 intracellular cytokine staining (ICS) assay for interferon gamma (IFN- $\gamma$ ) and T-cell proliferation assay. For  
522 IFN- $\gamma$  expression assay, cryopreserved PBMCs collected on day 35 post-immunization (0 dpc) were  
523 thawed and seeded at a density of  $5 \times 10^5$  cells/well in 96-well plate. Cells were stimulated with UV  
524 inactivated IAV-S at MOI of 1. Additionally, cells were stimulated with concanavalin (ConA: 2  $\mu$ g/ml)  
525 (Sigma, catalog no: C0412) plus phytohemagglutinin (PHA: 5  $\mu$ g/ml) (Sigma, catalog no: 61764) as  
526 positive control and cRPMI (RPMI with 10% FBS) was added to the negative control wells. Protein  
527 transport inhibitor, Brefeldin A (BD Biosciences, catalog no: 555029), was added 6 hours after  
528 stimulation and the cells were incubated for 12 hours prior to flow cytometric analysis. For the  
529 proliferation assay, PBMCs (35 dpi) were stained with 2.5  $\mu$ M carboxyfluorescein succinimidyl ester (CFSE;  
530 in PBS) (BD Horizon, catalog no: 565082). CFSE stained cells were seeded at a density of  $5 \times 10^5$   
531 cells/well in 96-well plate. The cells were stimulated as described above. After stimulation, the cells  
532 were incubated for 4 days at 37°C with 5% CO<sub>2</sub> prior to staining. Antibodies used for immunostaining the  
533 cells were : CD3+ (Mouse anti-pig CD3 $\epsilon$  Alexa Fluor 647; BD Pharmingen, catalog no: 561476), CD4+  
534 (Primary antibody: Mouse anti-pig CD4, Monoclonal Antibody Center (WSU), catalog no: 74-12-4;  
535 secondary antibody: Goat anti-mouse IgG2b PE/Cy7, Southern Biotech, catalog no: 1090-17), CD8+  
536 (Primary antibody: Mouse anti-pig CD8 $\alpha$ , Monoclonal Antibody Center (WSU), catalog no: 76-2-11;  
537 secondary antibody: Goat anti-mouse IgG2a FitC, Southern Biotech, catalog no: 1080-02), IFN- $\gamma$  (Anti-pig  
538 IFN- $\gamma$  PE, BD Pharmingen, catalog no: 559812. The stained cells were analyzed using Attune NxT flow-  
539 cytometer. Results were corrected for background proliferation by subtracting mock-stimulated  
540 proliferation from the frequency of cells that responded under inactivated SIV stimulation. The  
541 percentage of responding cells was calculated as the percentage of total T cells (live CD3+ cells).

542 **Statistical analysis**

543 Statistical analysis was performed using Graphpad Prism software. The normality of the data was tested  
544 using Shapiro-Wilk test. Comparison of means between the groups was done using two-way ANOVA for  
545 normal data or Kruskal Wallis test for non-normal data. Pairwise comparison was done using Tukey  
546 multiple comparison test. P value of less than 0.05 was considered significant. Flow cytometry data was  
547 analyzed using Flow Jo software.

#### 548 **Acknowledgement**

549 We thank the Animal Resource Wing (ARW) SDSU for their assistance in animal experiments. We thank  
550 the Cornell BRC Flow Cytometry Facility at the Cornell Institute of Biotechnology for the use of flow  
551 cytometers for data acquisition. We also would like to thank Bishwas Sharma, Maureen Hoch Vieira  
552 Fernandes, Jessica Caroline Gomes Noll, Gabriela Mansano do Nascimento, and Steve Lawson for their  
553 help with sample collection. This work was supported by AFRI Foundational and Applied Science  
554 Program (grant no. 2017-67015-32034/project accession no. NYCV478904) from the USDA National  
555 Institute of Food and Agriculture.

#### 556 **References**

- 557 1. Ma W. 2020. Swine influenza virus: Current status and challenge. *Virus Res.* Elsevier B.V.
- 558 2. Anderson TK, Chang J, Arendsee ZW, Venkatesh D, Souza CK, Kimble JB, Lewis NS, Davis CT,  
559 Vincent AL. 2020. Swine Influenza A Viruses and the Tangled Relationship with Humans. *Cold*  
560 *Spring Harb Perspect Med* a038737.
- 561 3. USDA. 2020. Influenza A Virus in Swine Surveillance.
- 562 4. OIE. 2009. SWINE INFLUENZA.
- 563 5. Vincent AL, Ma W, Lager KM, Janke BH, Richt JA. 2008. Swine Influenza Viruses. A North  
564 American Perspective. *Adv Virus Res.* Academic Press.
- 565 6. Chamba Pardo FO, Alba-Casals A, Nerem J, Morrison RB, Puig P, Torremorell M. 2017. Influenza  
566 herd-level prevalence and seasonality in breed-to-wean pig farms in the Midwestern United  
567 States. *Front Vet Sci* 4:11.
- 568 7. CFSH. 2016. Swine influenza.
- 569 8. Vincent AL, Perez DR, Rajao D, Anderson TK, Abente EJ, Walia RR, Lewis NS. 2017. Influenza A  
570 virus vaccines for swine. *Vet Microbiol* 206:35–44.

- 571 9. Vincent AL, Lager KM, Janke BH, Gramer MR, Richt JA. 2008. Failure of protection and enhanced  
572 pneumonia with a US H1N2 swine influenza virus in pigs vaccinated with an inactivated classical  
573 swine H1N1 vaccine. *Vet Microbiol* 126:310–323.
- 574 10. Genzow M, Goodell C, Kaiser TJ, Johnson W, Eichmeyer M. 2018. Live attenuated influenza virus  
575 vaccine reduces virus shedding of newborn piglets in the presence of maternal antibody.  
576 *Influenza Other Respi Viruses* 12:353–359.
- 577 11. Sharma A, Zeller MA, Li G, Harmon KM, Zhang J, Hoang H, Anderson TK, Vincent AL, Gauger PC.  
578 2020. Detection of live attenuated influenza vaccine virus and evidence of reassortment in the  
579 U.S. swine population. *J Vet Diagnostic Investig* 32:301–311.
- 580 12. ICTV. 2017. Virus taxonomy: Online (10th) Report of the International Committee on Taxonomy  
581 of Viruses.
- 582 13. Spyrou V, Valiakos G. 2015. Orf virus infection in sheep or goats. *Vet Microbiol* 181:178–182.
- 583 14. Haig DM, Mercer AA. 1998. Ovine diseases. *Orf. Vet Res* 29:311–26.
- 584 15. Delhon G, Tulman ER, Afonso CL, Lu Z, de la Concha-Bermejillo A, Lehmkuhl HD, Piccone ME,  
585 Kutish GF, Rock DL. 2004. Genomes of the Parapoxviruses Orf Virus and Bovine Papular  
586 Stomatitis Virus. *J Virol* 78:168–177.
- 587 16. Weber O, Knolle P, Volk H-D, Weber, Olaf, Knolle, Percy, Volk H-D, Weber O, Knolle P, Volk H-D.  
588 2007. Immunomodulation by inactivated Orf virus (ORFV) - therapeutic potential, p. 297–310. *In*  
589 Mercer, Andrew, Schmidt, Axel, Weber, O (ed.), *PoxvirusesFirst*. Birkhäuser Basel, Basel.
- 590 17. Weber O, Mercer AA, Friebe A, Knolle P, Volk H-D. 2013. Therapeutic immunomodulation using a  
591 virus--the potential of inactivated orf virus. *Eur J Clin Microbiol Infect Dis* 32:451–60.
- 592 18. Amann R, Rohde J, Wulle U, Conlee D, Raue R, Martinon O, Rziha H-J. 2012. A New Rabies  
593 Vaccine Based on a Recombinant Orf Virus (Parapoxvirus) Expressing the Rabies Virus  
594 Glycoprotein. *J Virol* 87:1618–1630.
- 595 19. Henkel M, Planz O, Fischer T, Stitz L, Rziha H-J. 2005. Prevention of virus persistence and  
596 protection against immunopathology after Borna disease virus infection of the brain by a novel  
597 Orf virus recombinant. *J Virol* 79:314–25.
- 598 20. Rohde J, Amann R, Rziha H-J. 2013. New Orf Virus (Parapoxvirus) Recombinant Expressing H5

- 599 Hemagglutinin Protects Mice against H5N1 and H1N1 Influenza A Virus) New Orf Virus  
600 (Parapoxvirus) Recombinant Expressing H5 Hemagglutinin Protects Mice against H5N1 and H1N1  
601 Influenza A Virus. PLoS One 8:83802.
- 602 21. Rohde J, Schirrmeier H, Granzow H, Rziha H-J. 2011. A new recombinant Orf virus (ORFV,  
603 Parapoxvirus) protects rabbits against lethal infection with rabbit hemorrhagic disease virus  
604 (RHDV). *Vaccine* 29:9256–64.
- 605 22. Hain KS, Joshi LR, Okda F, Nelson J, Singrey A, Lawson S, Martins M, Pillatzki A, Kutish G, Nelson  
606 EA, Flores EF, Diel DG. 2016. Immunogenicity of a Recombinant Parapoxvirus Expressing the  
607 Spike Protein of Porcine Epidemic Diarrhea Virus. *J Gen Virol*  
608 <https://doi.org/10.1099/jgv.0.000586>.
- 609 23. Joshi LR, Okda FA, Singrey A, Maggioli MF, Faccin TC, Fernandes MHV, Hain KS, Dee S, Bauermann  
610 F V., Nelson EA, Diel DG. 2018. Passive immunity to porcine epidemic diarrhea virus following  
611 immunization of pregnant gilts with a recombinant orf virus vector expressing the spike protein.  
612 *Arch Virol* 163:2327–2335.
- 613 24. Martins M, Joshi LR, Rodrigues FS, Anziliero D, Frandoloso R, Kutish GF, Rock DL, Weiblen R,  
614 Flores EF, Diel DG. 2017. Immunogenicity of ORFV-based vectors expressing the rabies virus  
615 glycoprotein in livestock species. *Virology*2017/09/13. 511:229–239.
- 616 25. Dory D, Fischer T, Béven V, Cariolet R, Rziha H-J, Jestin A. 2006. Prime-boost immunization using  
617 DNA vaccine and recombinant Orf virus protects pigs against Pseudorabies virus (Herpes suid 1).  
618 *Vaccine* 24:6256–63.
- 619 26. Voigt H, Merant C, Wienhold D, Braun A, Hutet E, Le Potier MF, Saalmüller A, Pfaff E, Büttner M.  
620 2007. Efficient priming against classical swine fever with a safe glycoprotein E2 expressing Orf  
621 virus recombinant (ORFV VrV-E2). *Vaccine* 25:5915–5926.
- 622 27. Joshi LR, Okda FA, Singrey A, Maggioli MF, Faccin TC, Fernandes MH V, Hain KS, Dee S,  
623 Bauermann F V, Nelson EA, Diel DG. 2018. Passive immunity to porcine epidemic diarrhea virus  
624 following immunization of pregnant gilts with a recombinant orf virus vector expressing the spike  
625 protein. *Arch Virol*2018/05/05. 163:2327–2335.
- 626 28. Fischer T, Planz O, Stitz L, Rziha H-J. 2003. Novel recombinant parapoxvirus vectors induce  
627 protective humoral and cellular immunity against lethal herpesvirus challenge infection in mice. *J*

- 628            Virol 77:9312–23.
- 629    29.    Haig DM, McInnes CJ. 2002. Immunity and counter-immunity during infection with the  
630            parapoxvirus orf virus. *Virus Research*.
- 631    30.    Mercer AA, Yirrell DL, Reid HW, Robinson AJ. 1994. Lack of cross-protection between vaccinia  
632            virus and orf virus in hysterectomy-procured, barrier-maintained lambs. *Vet Microbiol* 41:373–  
633            382.
- 634    31.    Fleming SB, Anderson IE, Thomson J, Deane DL, McInnes CJ, McCaughan CA, Mercer AA, Haig  
635            DM. 2007. Infection with recombinant orf viruses demonstrates that the viral interleukin-10 is a  
636            virulence factor. *J Gen Virol* 88:1922–7.
- 637    32.    Seet BT, McCaughan CA, Handel TM, Mercer A, Brunetti C, McFadden G, Fleming SB. 2003.  
638            Analysis of an orf virus chemokine-binding protein: Shifting ligand specificities among a family of  
639            poxvirus viroceptors. *Proc Natl Acad Sci U S A* 100:15137–15142.
- 640    33.    Deane D, McInnes CJ, Percival A, Wood A, Thomson J, Lear A, Gilray J, Fleming S, Mercer A, Haig  
641            D. 2000. Orf virus encodes a novel secreted protein inhibitor of granulocyte-macrophage colony-  
642            stimulating factor and interleukin-2. *J Virol* 74:1313–20.
- 643    34.    McInnes CJ, Wood AR, Mercer AA. 1998. Orf virus encodes a homolog of the vaccinia virus  
644            interferon-resistance gene E3L. *Virus Genes* 17:107–15.
- 645    35.    Westphal D, Ledgerwood EC, Hibma MH, Fleming SB, Whelan EM, Mercer AA. 2007. A novel Bcl-  
646            2-like inhibitor of apoptosis is encoded by the parapoxvirus ORF virus. *J Virol* 81:7178–88.
- 647    36.    Diel DG, Delhon G, Luo S, Flores EF, Rock DL. 2010. A novel inhibitor of the NF- $\kappa$ B signaling  
648            pathway encoded by the parapoxvirus orf virus. *J Virol* 84:3962–73.
- 649    37.    Diel DG, Luo S, Delhon G, Peng Y, Flores EF, Rock DL. 2011. A nuclear inhibitor of NF-kappaB  
650            encoded by a poxvirus. *J Virol* 85:264–75.
- 651    38.    Khatiwada S, Delhon G, Nagendraprabhu P, Chaulagain S, Luo S, Diel DG, Flores EF, Rock DL.  
652            2017. A parapoxviral virion protein inhibits NF- $\kappa$ B signaling early in infection. *PLOS Pathog*  
653            13:e1006561.
- 654    39.    Diel DG, Luo S, Delhon G, Peng Y, Flores EF, Rock DL. 2011. Orf virus ORFV121 encodes a novel  
655            inhibitor of NF-kappaB that contributes to virus virulence. *J Virol* 85:2037–2049.



- 656 40. Stanekov Z, Varekov E. 2010. Conserved epitopes of influenza A virus inducing protective  
657 immunity and their prospects for universal vaccine development. *Viol J. BioMed Central*.
- 658 41. Knossow M, Gaudier M, Douglas A, Barrère B, Bizebard T, Barbey C, Gigant B, Skehel JJ. 2002.  
659 Mechanism of neutralization of influenza virus infectivity by antibodies. *Virology* 302:294–298.
- 660 42. Grant E, Wu C, Chan KF, Eckle S, Bharadwaj M, Zou QM, Kedzierska K, Chen W. 2013.  
661 Nucleoprotein of influenza A virus is a major target of immunodominant CD8 + T-cell responses.  
662 *Immunol Cell Biol* 91:184–194.
- 663 43. Liu X, Kremer M, Broyles SS. 2004. A natural vaccinia virus promoter with exceptional capacity to  
664 direct protein synthesis. *J Virol Methods* 122:141–145.
- 665 44. Chakrabarti S, Sisler JR, Moss B. 1997. Compact, synthetic, vaccinia virus early/late promoter for  
666 protein expression. *Biotechniques* 23:1094–1097.
- 667 45. Fleming SB, McCaughan CA, Andrews AE, Nash AD, Mercer AA. 1997. A homolog of interleukin-10  
668 is encoded by the poxvirus orf virus. *J Virol* 71:4857–61.
- 669 46. Dumont FJ. 2003. Therapeutic potential of IL-10 and its viral homologues: an update. *Expert Opin*  
670 *Ther Pat* 13.
- 671 47. Moore KW, de Waal Malefyt R, Coffman RL, O’Garra A. 2001. Interleukin-10 and the Interleukin-  
672 10 Receptor. *Annu Rev Immunol* 19:683–765.
- 673 48. Martins M, Rodrigues FS, Joshi LR, Jos´ J, Jardim JC, Flores MM, Weiblen R, Flores EF, Diel DG,  
674 Jardim JJ. 2021. Orf virus ORFV112, ORFV117 and ORFV127 contribute to ORFV IA82 virulence in  
675 sheep. *Vet Microbiology* <https://doi.org/10.1016/j.vetmic.2021.109066>.
- 676 49. Topham DJ, Tripp RA, Doherty PC. 1997. CD8+ T cells clear influenza virus by perforin or Fas-  
677 dependent processes. *J Immunol* 159.
- 678 50. Soema PC, Van Riet E, Kersten G, Amorij JP. 2015. Development of cross-protective influenza A  
679 vaccines based on cellular responses. *Front Immunol. Frontiers Media S.A.*
- 680 51. Sun J, Braciale TJ. 2013. Role of T cell immunity in recovery from influenza virus infection. *Curr*  
681 *Opin Virol. Elsevier B.V.*
- 682 52. Hamada H, Bassity E, Flies A, Strutt TM, Garcia-Hernandez M de L, McKinstry KK, Zou T, Swain SL,

- 683 Dutton RW. 2013. Multiple Redundant Effector Mechanisms of CD8 + T Cells Protect against  
684 Influenza Infection . J Immunol 190:296–306.
- 685 53. Chen L, Zanker D, Xiao K, Wu C, Zou Q, Chen W. 2014. Immunodominant CD4+ T-Cell Responses  
686 to Influenza A Virus in Healthy Individuals Focus on Matrix 1 and Nucleoprotein  
687 <https://doi.org/10.1128/JVI.01631-14>.
- 688 54. Gao XM, Liew FY, Tite JP. 1989. Identification and characterization of T helper epitopes in the  
689 nucleoprotein of influenza A virus. J Immunol 143.
- 690 55. Wu C, Zanker D, Valkenburg S, Tan B, Kedzierska K, Ming Zou Q, Doherty PC, Chen W. 2011.  
691 Systematic identification of immunodominant CD8 + T-cell responses to influenza A virus in HLA-  
692 A2 individuals. PNAS 108:9178–9183.
- 693 56. Yewdell JW, Bennink JR, Smith GL, Moss B. 1985. Influenza A virus nucleoprotein is a major target  
694 antigen for cross-reactive anti-influenza A virus cytotoxic T lymphocytes. Proc Natl Acad Sci U S A  
695 82:1785–1789.
- 696 57. Cassotta A, Paparoditis P, Geiger R, Mettu RR, Landry SJ, Donati A, Benevento M, Foglierini M,  
697 Lewis DJM, Lanzavecchia A, Sallusto F. 2020. Deciphering and predicting CD4+ T cell  
698 immunodominance of influenza virus hemagglutinin. J Exp Med 217.
- 699 58. Bui HH, Peters B, Assarsson E, Mbawuikie I, Sette A. 2007. Ab and T cell epitopes of influenza A  
700 virus, knowledge and opportunities. Proc Natl Acad Sci U S A 104:246–251.
- 701 59. Stevens TL, Bossie A, Sanders VM, Fernandez-Botran R, Coffman RL, Mosmann TR, Vitetta ES.  
702 1988. Regulation of antibody isotype secretion by subsets of antigen-specific helper T cells.  
703 Nature 334:255–258.
- 704 60. Crawley A, Wilkie BN. 2003. Porcine Ig isotypes: Function and molecular characteristics. Vaccine  
705 21:2911–2922.
- 706 61. Bretscher PA. 2014. On the Mechanism Determining the Th1/Th2 Phenotype of an Immune  
707 Response, and its Pertinence to Strategies for the Prevention, and Treatment, of Certain  
708 Infectious Diseases. Scand J Immunol 79:361–376.
- 709 62. Crawley A, Raymond C, Wilkie BN. 2003. Control of immunoglobulin isotype production by  
710 porcine B-cells cultured with cytokines. Vet Immunol Immunopathol 91:141–154.

- 711 63. Vincent AL, Swenson SL, Lager KM, Gauger PC, Loiacono C, Zhang Y. 2009. Characterization of an  
712 influenza A virus isolated from pigs during an outbreak of respiratory disease in swine and people  
713 during a county fair in the United States. *Vet Microbiol* 137:51–59.
- 714 64. Kozak M. 1987. An analysis of 5'-noncoding sequences from 699 vertebrate messenger rNAS.  
715 *Nucleic Acids Res* 15:8125–8148.
- 716 65. Sauer B, Handerson N. 1990. Targeted insertion of exogenous DNA into the eukaryotic genome  
717 by the Cre recombinase - PubMed. *New Biol* 2:441–9.
- 718 66. Hierholzer JC, Killington RA. 1996. Virus isolation and quantitation, p. 25–46. *In Virology Methods*  
719 *Manual*. Elsevier.
- 720 67. Hain KS, Joshi LR, Okda F, Nelson J, Singrey A, Lawson S, Martins M, Pillatzki A, Kutish GF, Nelson  
721 EA, Flores EF, Diel DG. 2016. Immunogenicity of a recombinant parapoxvirus expressing the spike  
722 protein of Porcine epidemic diarrhea virus. *J Gen Virol* 97:2719–2731.
- 723 68. Yassine HM, Khatri M, Zhang YJ, Lee CW, Byrum BA, O'Quin J, Smith KA, Saif YM. 2009.  
724 Characterization of triple reassortant H1N1 influenza A viruses from swine in Ohio. *Vet Microbiol*  
725 139:132–139.
- 726 69. WHO. 2011. Manual for the laboratory diagnosis and virological surveillance of influenza. WHO  
727 Global Influenza Surveillance Network.
- 728 70. Dhakal S, Hiremath J, Bondra K, Lakshmanappa YS, Shyu DL, Ouyang K, Kang K il, Binjawadagi B,  
729 Goodman J, Tabynov K, Krakowka S, Narasimhan B, Lee CW, Renukaradhya GJ. 2017.  
730 Biodegradable nanoparticle delivery of inactivated swine influenza virus vaccine provides  
731 heterologous cell-mediated immune response in pigs. *J Control Release* 247:194–205.

732

### 733 **Figure legends**

734 **Figure 1. Construction of ORFV recombinants and their replication kinetics. (A)** Schematic  
735 representation of homologous recombination between pUC57-121LR-SIV-HA-loxp-GFP plasmid and  
736 ORFV-IA82 genome. The recombinant virus was treated with Cre recombinase to remove GFP marker  
737 gene to obtain markerless OV-HA construct. **(B)** Schematic representation of homologous recombination  
738 between pUC57-127LR-SIV-NP-loxp-GFP plasmid and OV-HA genome. The recombinant virus was

739 treated with Cre recombinase to obtain markerless OV-HA-NP construct. **(C)** Multi-step (0.1 MOI) and  
740 single step (10 MOI) growth curve of OV-HA and OV-HA-NP. OFTu or STU cells were infected with OV-HA  
741 and-HA-NP recombinants and virus titers were calculated at 0, 6, 12, 24, 48 and 72 hours post-infection.  
742 Error bars represent SEM calculated based on three independent experiments.

743 **Figure 2. Expression of heterologous proteins by ORFV recombinants. (A)** Immunofluorescence assay in  
744 permeabilized OFTu cells. Upper panel shows expression of HA protein and absence of NP protein in OV-  
745 HA recombinant. Lower panel shows expression of HA and NP protein by OV-HA-NP recombinant. **(B)**  
746 Immunofluorescence assay performed in non-permeabilized OFTu cells. Upper panel shows expression  
747 of HA by OV-HA recombinant and lower panel shows expression of HA and NP by OV-HA-NP  
748 recombinant. Blue fluorescence in merged images in panel A and B indicates nuclear staining by DAPI.  
749 **(C)** Expression of heterologous proteins by ORFV recombinants assessed by flow-cytometry. OFTu cells  
750 were infected with OV-HA, OV-HA-NP or Wild-type OV-IA82 as negative control. Infected cells were  
751 collected 48 hours post-infection, fixed and then stained with appropriate antibodies for flow cytometric  
752 analysis.

753 **Figure 3. Immunization-challenge experiment design and humoral response to immunization. (A)** A  
754 timeline of immunization-challenge experiment. **(B)** IAV-S specific neutralizing antibody response  
755 elicited by immunization with OV-HA and OV-HA-NP. **(C)** IAV-S specific humoral immune response  
756 induced by OV-HA and OV-HA-NP assessed by hemagglutination inhibition (HI) assay. Red arrow heads  
757 represent the day of challenge. The error bars represent SEM. VN titer shown in logarithmic scale for  
758 effective visualization. HI titer shown in liner scale. P-values: \* $P < 0.05$ , \*\* $P < 0.01$ , \*\*\* $P < 0.001$ , \*\*\*\* $P$   
759  $< 0.0001$ .

760 **Figure 4. IAV-S specific IgG responses to immunization. (A)** Total serum IgG level elicited by OV-HA and  
761 OV-HA-NP immunization at various time points were assessed by ELISA. Isotype ELISA demonstrating  
762 endpoint titers elicited by immunization at 35 days pi in serum was assessed for detecting specific **(B)**  
763 IgG1 and **(C)** IgG2 antibodies. **(D)** IgG1/IgG2 ratio in immunized animals was calculated. Each dot  
764 represents IgG1/IgG2 ratio of an individual animal. Middle bar represents mean ratio and upper and  
765 lower bars represent range. P-values: \* $P < 0.05$ , \*\* $P < 0.01$ , \*\*\* $P < 0.001$ , \*\*\*\* $P < 0.0001$ .

766 **Figure 5. T-cell immune response to immunization.** PBMCs isolated from pigs at 35 dpi following recall  
767 stimulation with inactivated IAV-S were analysed for: **(A)** IFN- $\gamma$  production by different T-cell subsets  
768 measured by flow cytometry assay; and **(B)** T-cells proliferation by CFSE dilution assay. Data represents

769 group means and error bars represent SEM. P-values:  $*P < 0.05$ ,  $**P < 0.01$ ,  $***P < 0.001$ ,  $****P <$   
770  $0.0001$ .

771 **Figure 6. Protective efficacy of OV-HA and OV-HA-NP against IAV-S challenge. (A)** IAV-S viral RNA  
772 shedding in the nasal swab was determined by RT-qPCR and expressed as log<sub>10</sub> genome copy number  
773 per milliliter. **(B)** IAV-S viral load in the lung determined by RT-qPCR and expressed as log<sub>10</sub> genome  
774 copy number per milliliter. Data represents group mean and error bars represent SEM. P-values:  $*P <$   
775  $0.05$ ,  $**P < 0.01$ ,  $***P < 0.001$ ,  $****P < 0.0001$ .

776

777

778

779

780

781

782

783

784

785

786

787

788

789

790

791

792

793 **Tables**

794 Table 1. Experimental design for immunization-challenge study

| Group | Immunization | Number of animals | Immunization Days | Immunization Route | Challenge                     | Challenge Dose (Route)                             |
|-------|--------------|-------------------|-------------------|--------------------|-------------------------------|----------------------------------------------------|
| 1     | Control      | 8                 | 0, 21             | IM                 | H1N1<br>A/Swine/OH/24366/2007 | $6 \times 10^6$ TCID <sub>50</sub><br>(Intranasal) |
| 2     | OV-HA        | 8                 | 0, 21             | IM                 | H1N1<br>A/Swine/OH/24366/2007 | $6 \times 10^6$ TCID <sub>50</sub><br>(Intranasal) |
| 3     | OV-HA-NP     | 8                 | 0, 21             | IM                 | H1N1<br>A/Swine/OH/24366/2007 | $6 \times 10^6$ TCID <sub>50</sub><br>(Intranasal) |

795

796 Table 2. Virus isolation from the nasal swabs

| Groups          | 0 dpc | 1 dpc                                                            | 3 dpc                                                             | 7 dpc |
|-----------------|-------|------------------------------------------------------------------|-------------------------------------------------------------------|-------|
| Control         | 0/8   | 4/8 (50%)                                                        | 7/8 (87.5%)                                                       | 0/8   |
| OV-HA           | 0/8   | 0/8                                                              | 3/8 (37.5%)                                                       | 0/8   |
| OV-HA-NP        | 0/8   | 0/8                                                              | 1/8 (12.5%)                                                       | 0/8   |
| <i>P-values</i> | -     | <sup>a</sup> <i>P</i> = 0.0769<br><sup>b</sup> <i>P</i> = 0.0769 | <sup>a</sup> <i>P</i> = 0.1189<br><sup>b</sup> <i>P</i> = 0.0101* | -     |

797 <sup>a</sup>*P*-value determined by Fisher's exact test between Control and OV-HA group

798 <sup>b</sup>*P*-value determined by Fisher's exact test between Control and OV-HA-NP group

799 \*Statistically significant difference at *P* < 0.05

800

801

802

803

804

805

806

807

808

809

810

811 Table 3. Pathological and serological findings post-IAV-S-challenge in immunized pigs.

| Control   |                                                                                                              |                       | OV-HA     |                                                         |                       | OV-HA-NP  |                                                            |                       |
|-----------|--------------------------------------------------------------------------------------------------------------|-----------------------|-----------|---------------------------------------------------------|-----------------------|-----------|------------------------------------------------------------|-----------------------|
| Animal ID | Gross Lesions                                                                                                | VN Titer <sup>a</sup> | Animal ID | Gross Lesions                                           | VN Titer <sup>a</sup> | Animal ID | Gross Lesions                                              | VN Titer <sup>a</sup> |
| 22        | Lobular consolidation on the left cranioventral areas                                                        | <1:5                  | 20        | Mild lobular consolidations on both right and left lung | 1:80                  | 21        | No lesions                                                 | 1:5120                |
| 23        | Lobular consolidation present on ventral areas                                                               | <1:5                  | 24        | No lesions                                              | 1:320                 | 25        | No lesions                                                 | 1:2560                |
| 29        | Lobular consolidation mostly present on cranioventral surface and interstitial inflammation on the left lobe | <1:5                  | 26        | Mild lobular consolidation on both sides of the lung    | 1:40                  | 27        | No lesions                                                 | 1:640                 |
| 30        | Lobular consolidation mostly present on cranioventral area                                                   | <1:5                  | 33        | No lesions                                              | 1:640                 | 28        | No lesions                                                 | 1:1280                |
| 31        | Lobular consolidation mostly present on cranioventral area                                                   | <1:5                  | 34        | No lesions                                              | 1:2560                | 32        | No lesions                                                 | 1:1280                |
| 39        | Lobular consolidation mostly present on cranioventral area                                                   | <1:5                  | 35        | No lesions                                              | 1:1280                | 37        | Very mild lobular consolidation                            | 1:640                 |
| 40        | Lobular consolidation mostly present on cranioventral area                                                   | <1:5                  | 36        | No lesions                                              | 1:640                 | 38        | Congestion on apical lobe with mild interstitial pneumonia | 1:640                 |
| 48        | Lobular consolidation on both sides of the cranioventral area                                                | <1:5                  | 49        | No lesions                                              | 1:320                 | 41        | No lesions                                                 | 1:2560                |

812 <sup>a</sup>VN titer measured on day 35 post-immunization.

813 All animals were terminated and examined on day 7 post-challenge and evaluated by a pathologist blinded to the study.

814



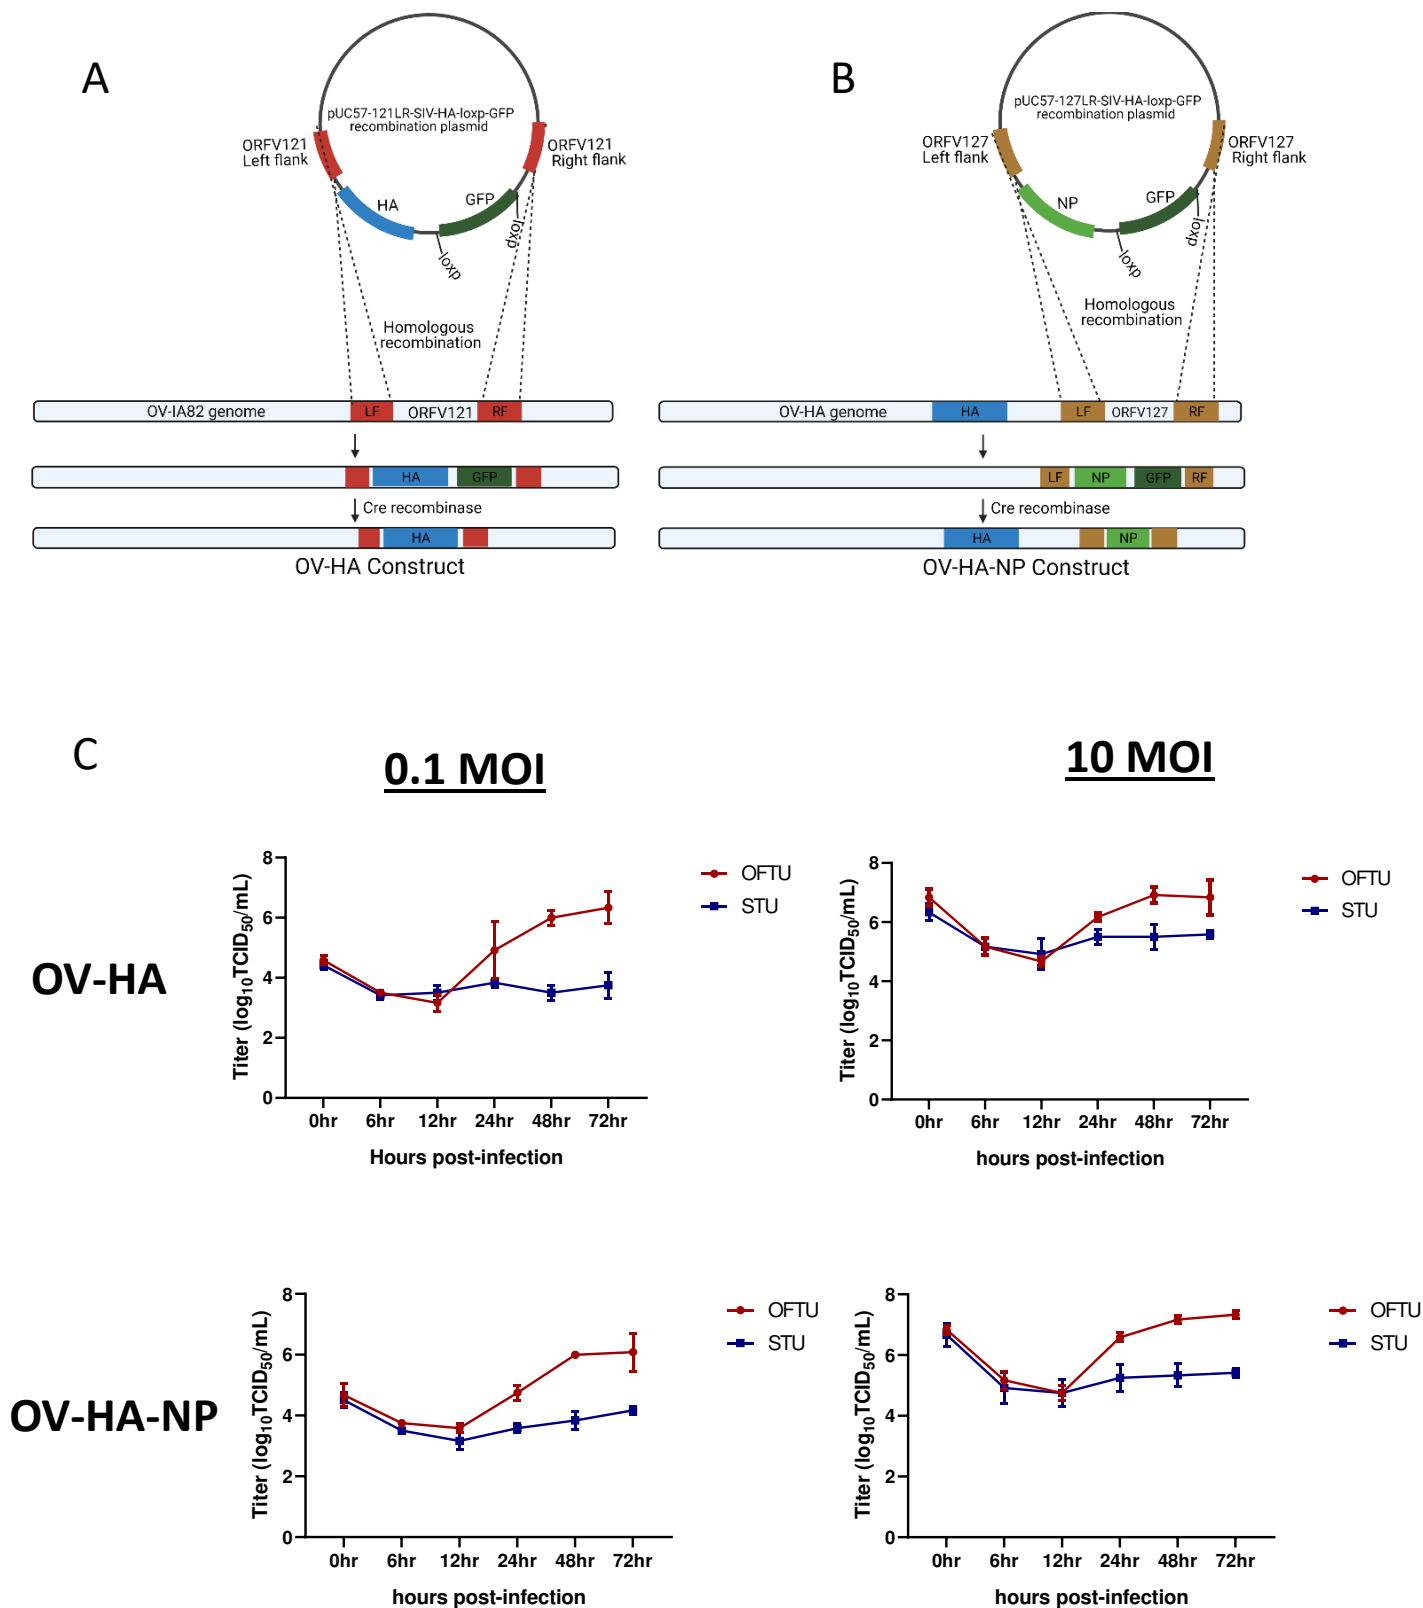

Figure 1

**A**

Permeabilized

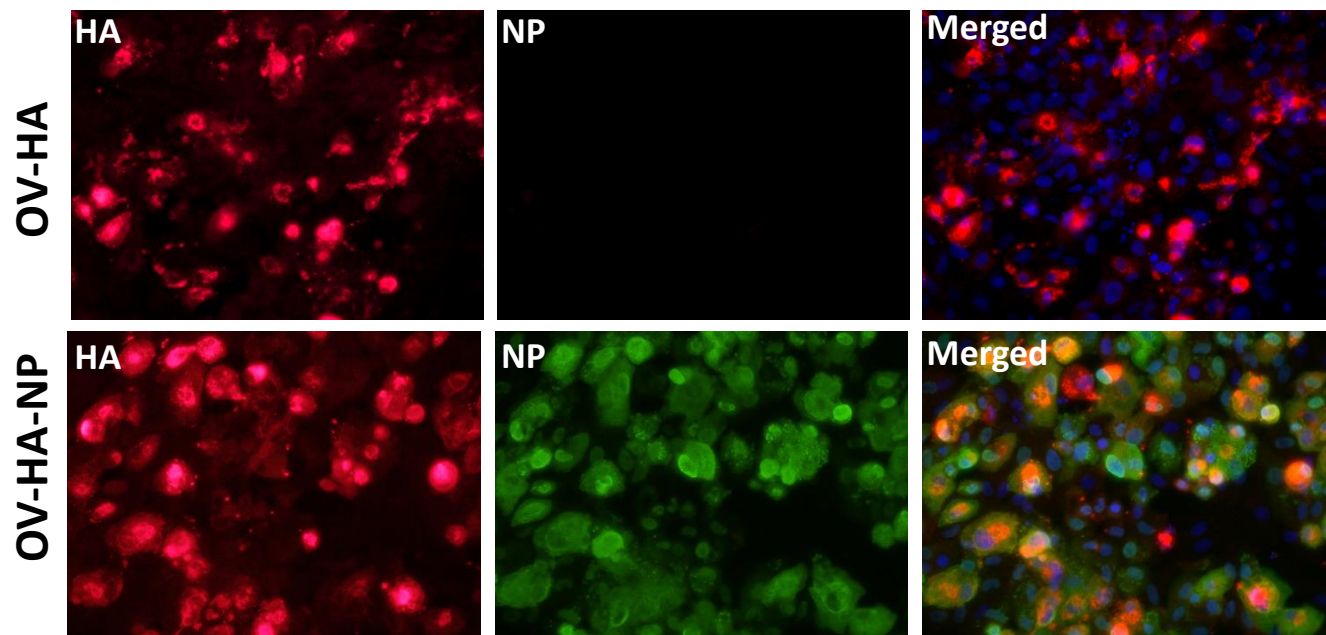

**B**

Non-permeabilized

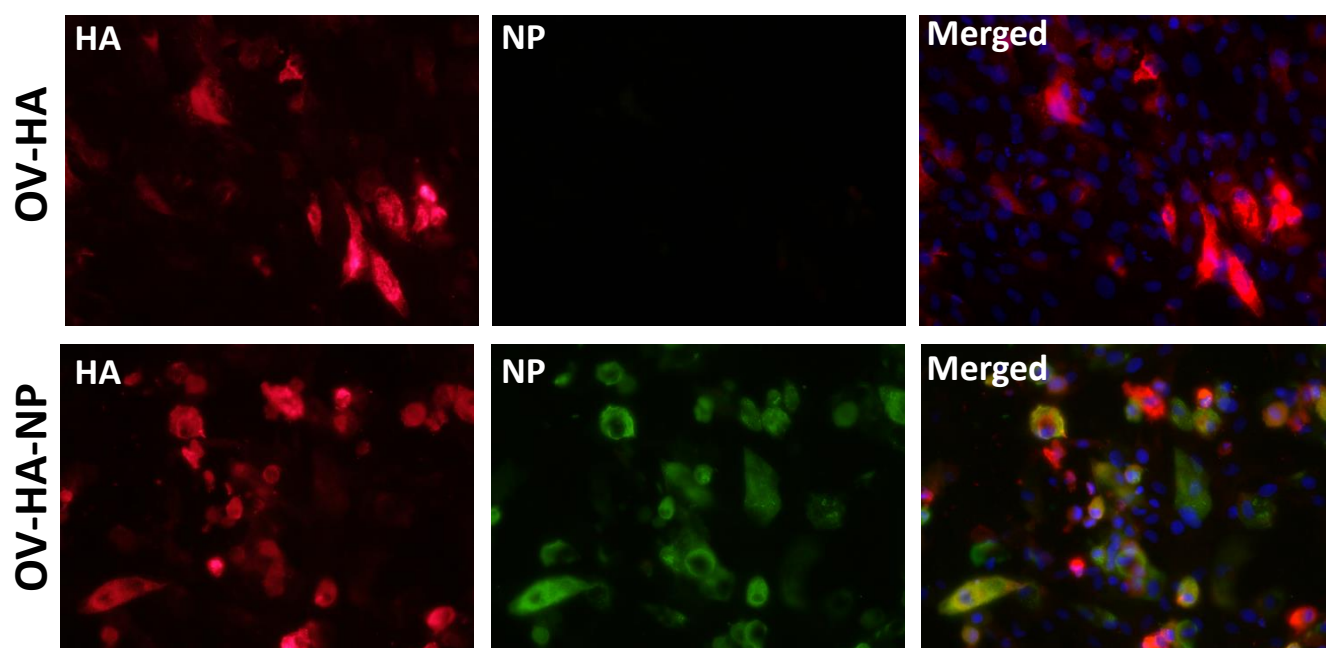

**C**

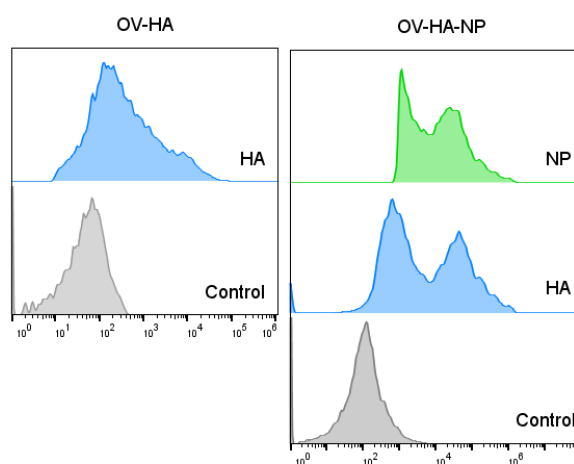

Figure 2

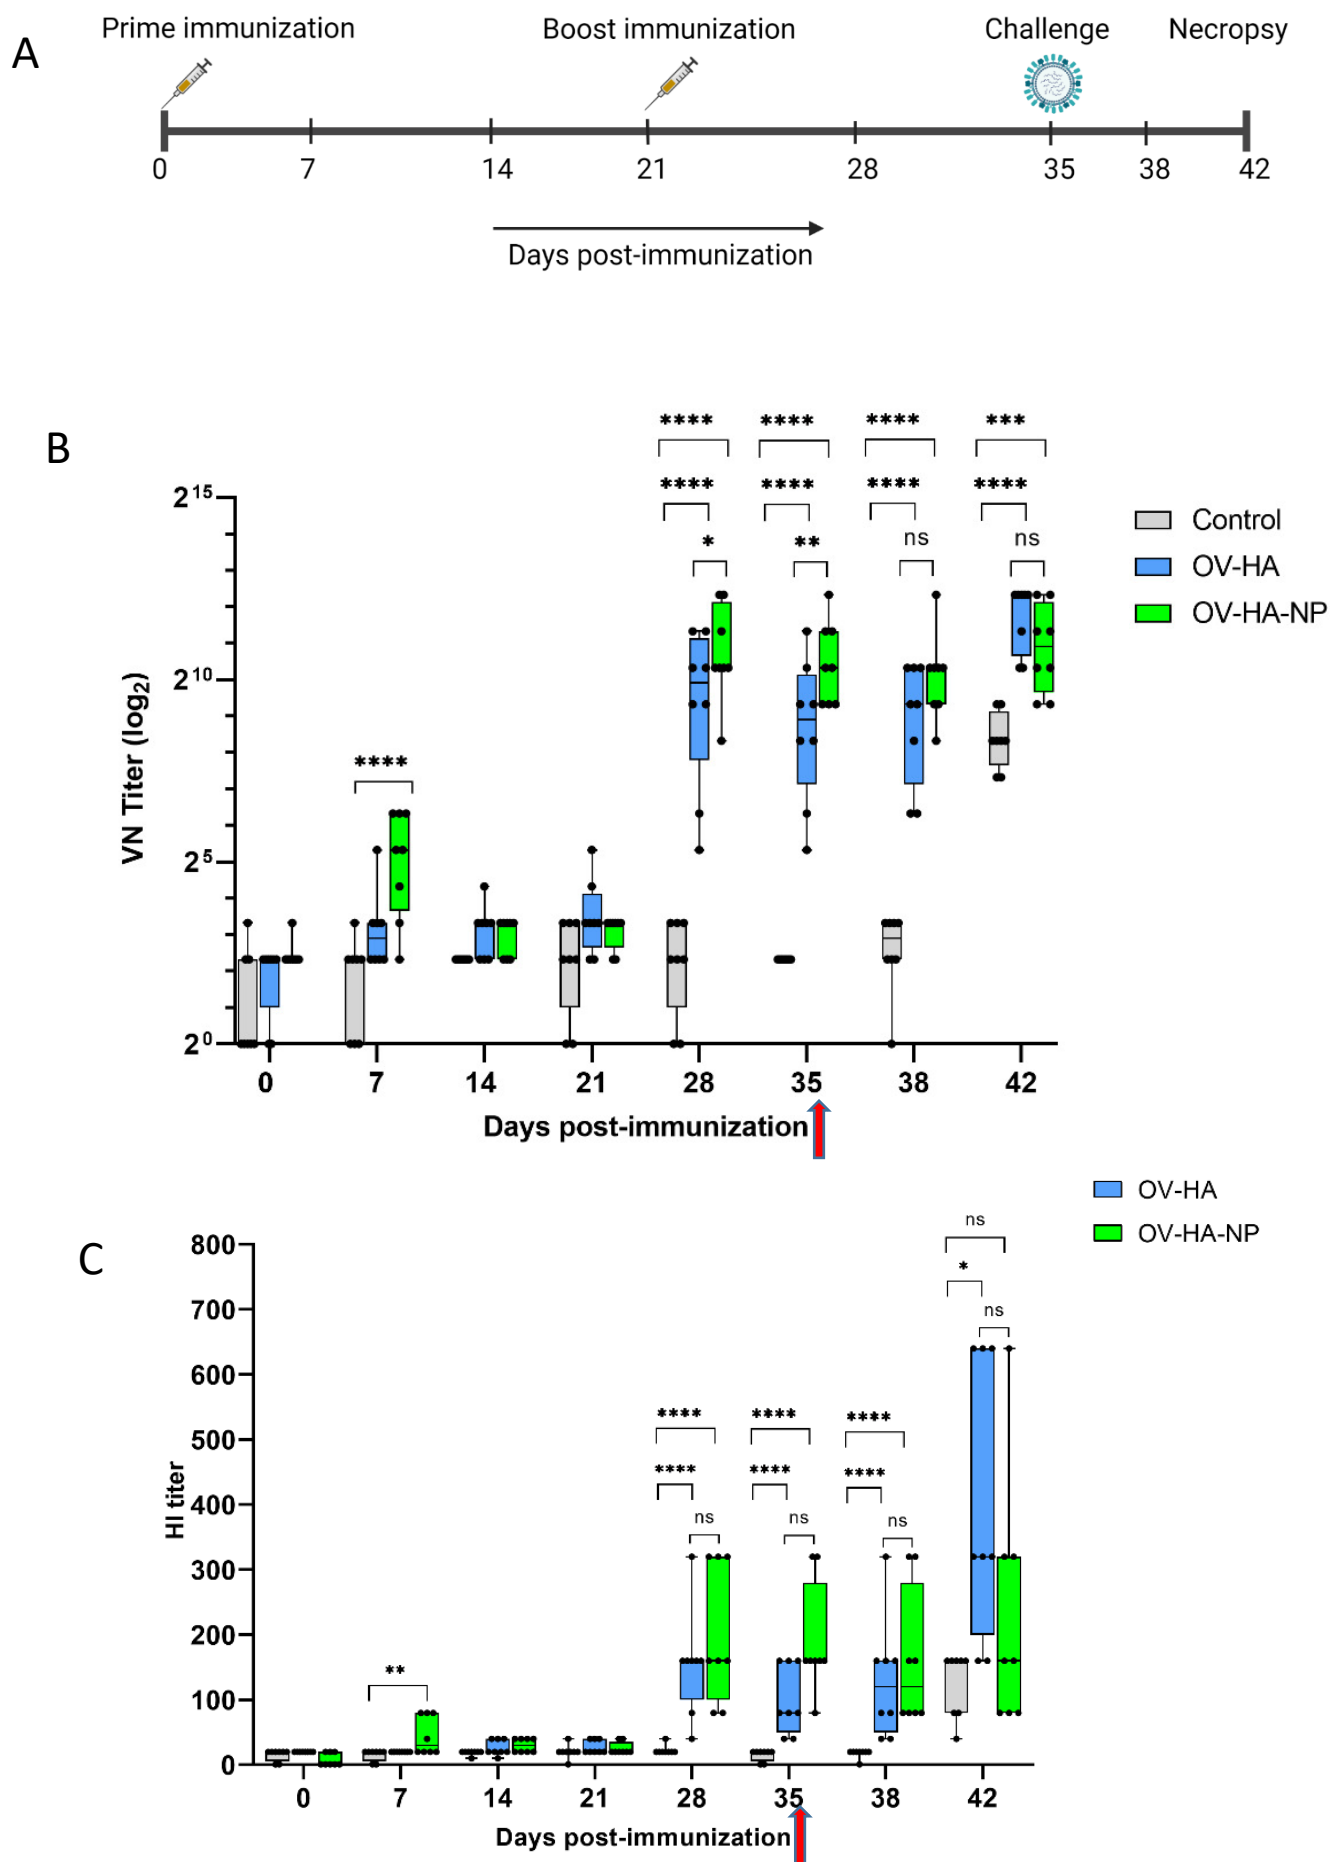

Figure 3

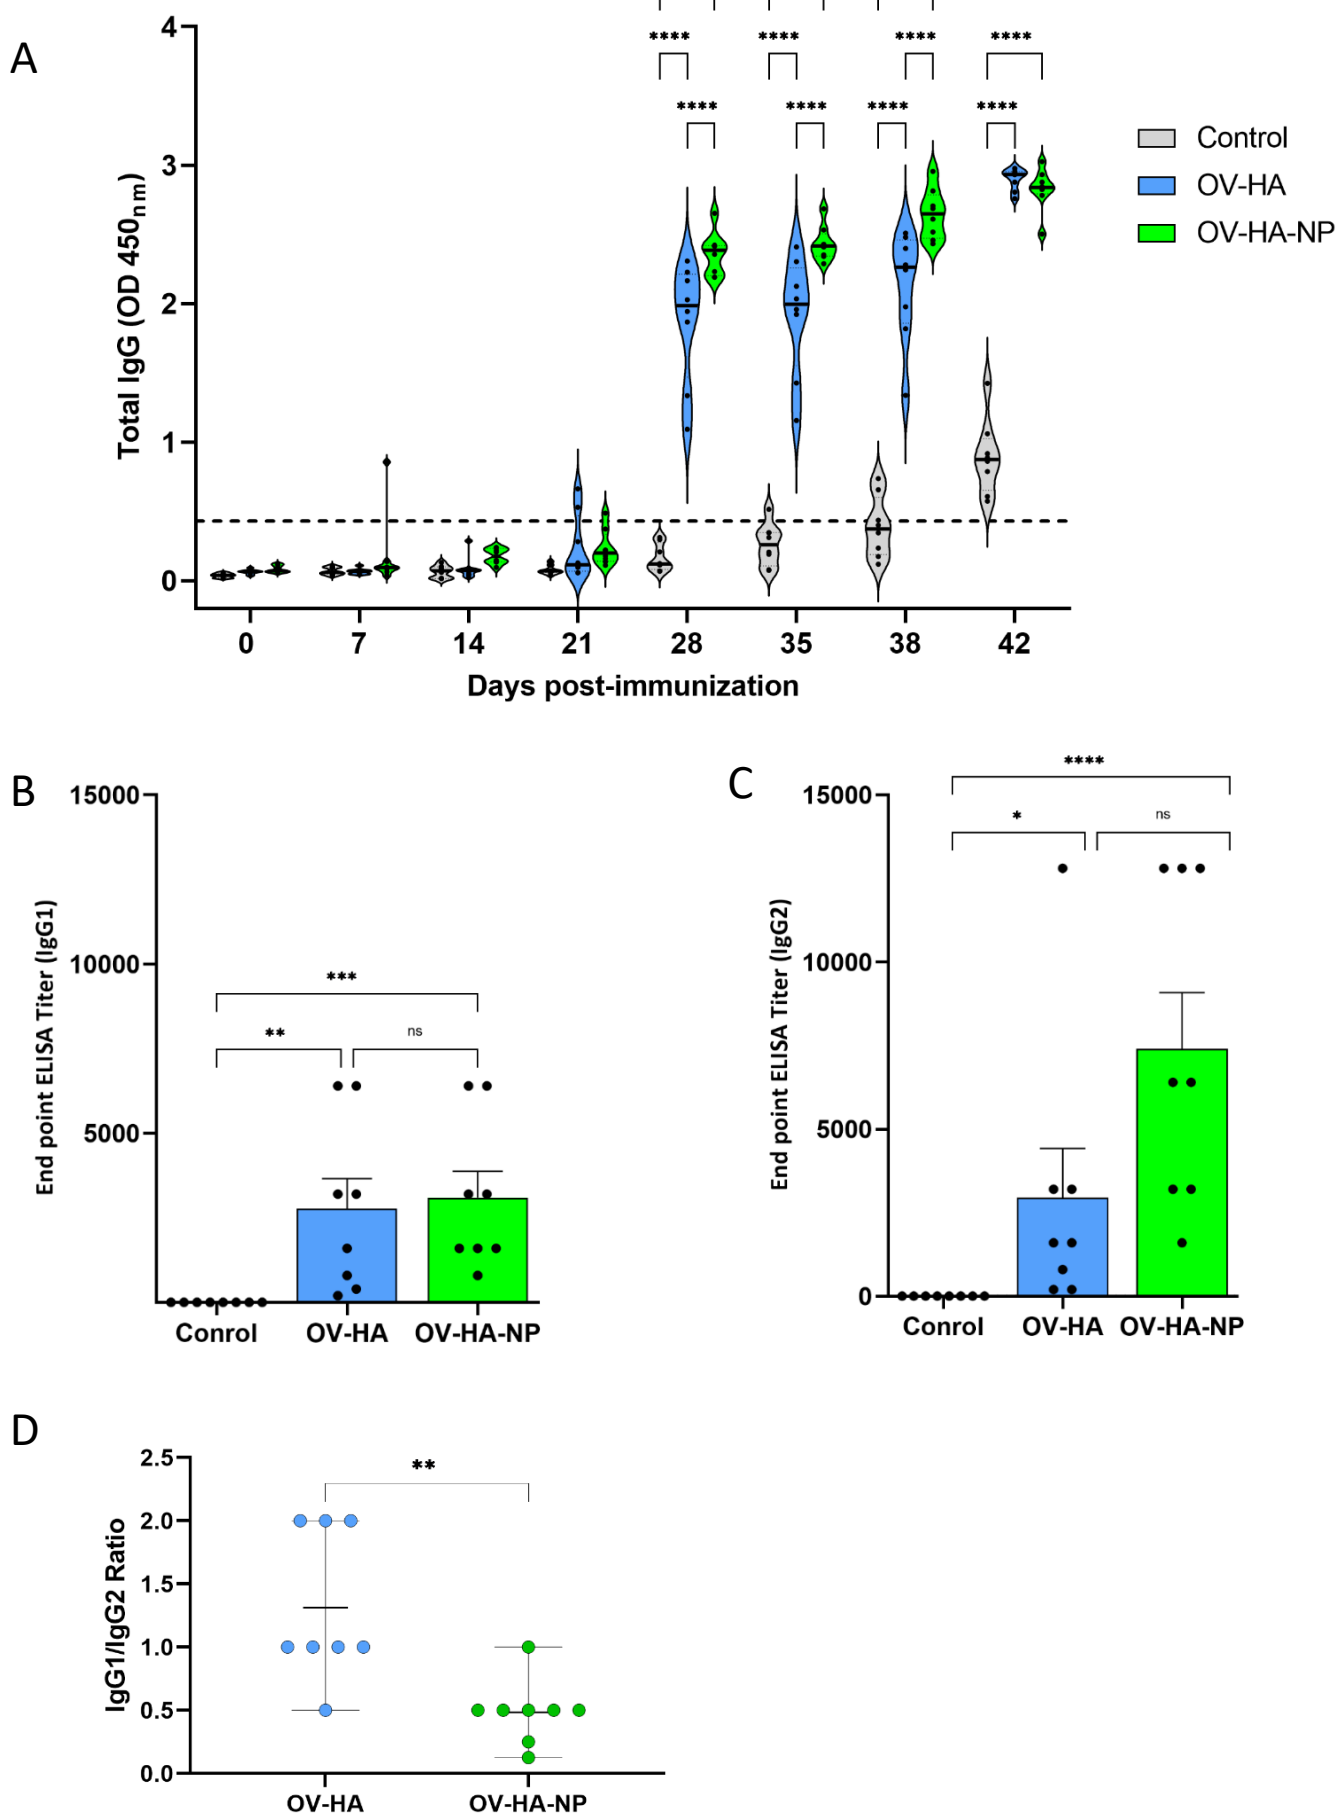

Figure 4

## IFN- $\gamma$

A

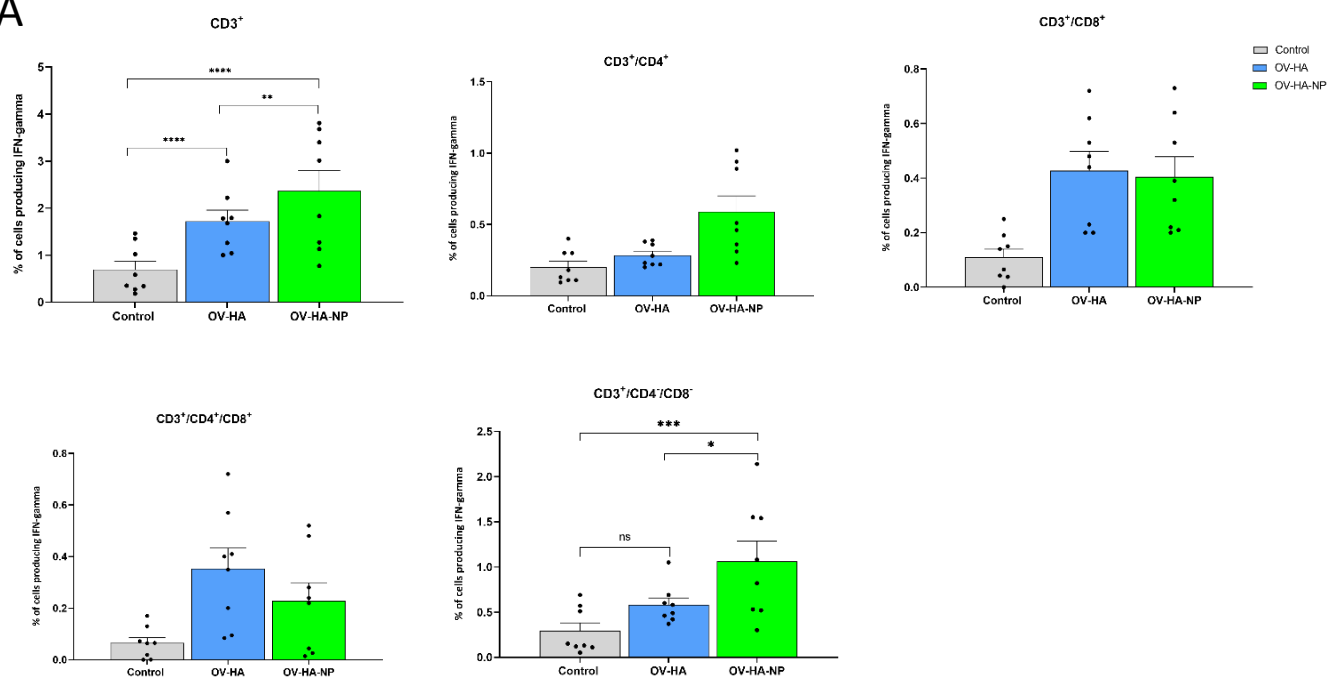

## Proliferation

B

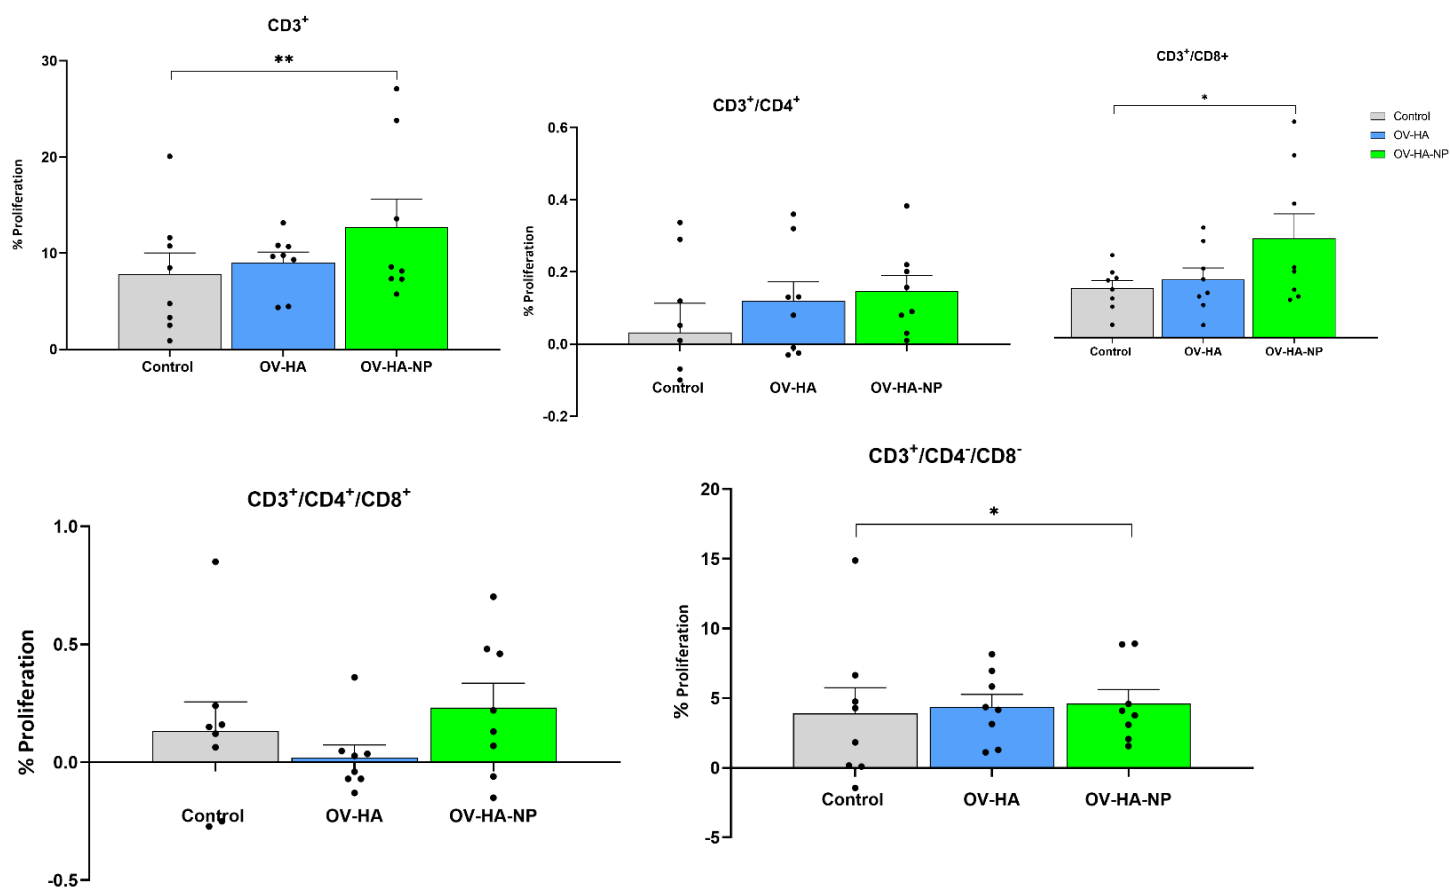

Figure 5

## Nasal swab

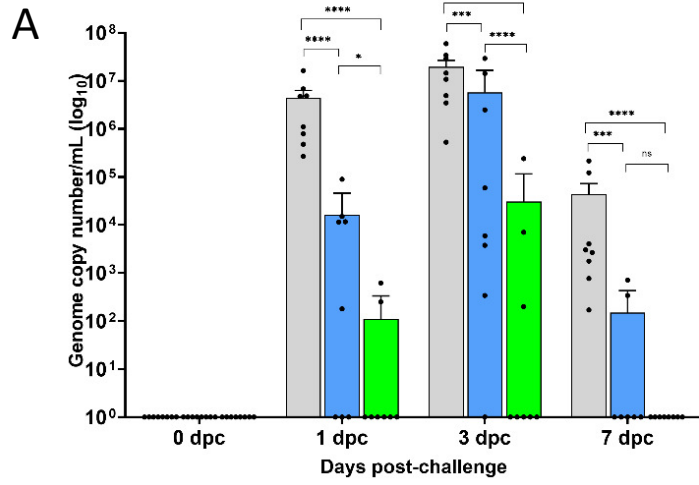

## Lung

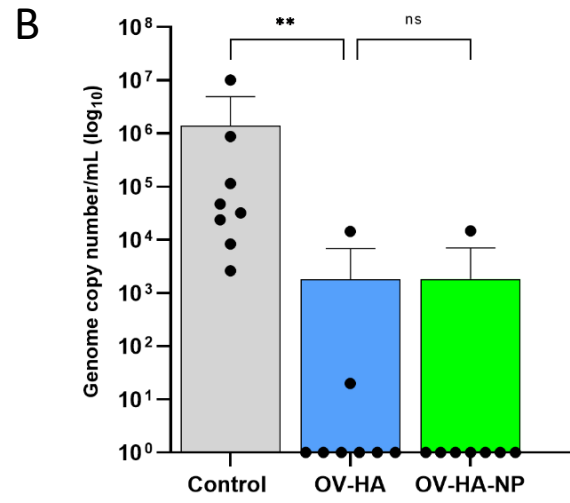

Figure 6
